## **Title:** From primordial clocks to circadian oscillators

**Authors:** Warintra Pitsawong<sup>1,#,†</sup>, Ricardo A. P. Pádua<sup>1,#</sup>, Timothy Grant<sup>2,#,‡</sup>, Marc Hoemberger<sup>1,§</sup>, Renee Otten<sup>1,§</sup>, Niels Bradshaw<sup>3</sup>, Nikolaus Grigorieff<sup>2,§</sup>, Dorothee Kern<sup>1,\*</sup>

### **Affiliations:**

<sup>1</sup> Howard Hughes Medical Institute and Department of Biochemistry, Brandeis University, 415 South Street, Waltham, MA 02454, USA

<sup>2</sup> Janelia Research Campus, Howard Hughes Medical Institute, 19700 Helix Dr, Ashburn, VA 20147, USA

<sup>3</sup> Department of Biochemistry, Brandeis University, 415 South Street, Waltham, MA 02454, USA

<sup>†</sup> Present address: Biomolecular Discovery, Relay Therapeutics, Cambridge, MA 02139, USA

<sup>‡</sup> Present address: John and Jeanne Rowe Center for Research in Virology, Morgridge Institute for Research, Madison, 330 N Orchard Street, Madison, WI 53715, USA and Department of Biochemistry, University of Wisconsin-Madison, 433 Babcock Drive, Madison, WI 53706, USA

<sup>§</sup> Present address: Treeline Biosciences, 500 Arsenal Street, 2nd Floor, Watertown, MA 02472, USA

<sup>§</sup> Present address: Howard Hughes Medical Institute, RNA Therapeutics Institute, University of Massachusetts Chan Medical School, 368 Plantation Street, Worcester, MA 01605, USA

<sup>#</sup> these authors contributed equally to this work

<sup>\*</sup> Correspondence and requests for materials should be addressed to D.K. ([dkern@brandeis.edu](mailto:dkern@brandeis.edu))

### **Abstract:**

Circadian rhythms play an essential role in many biological processes and surprisingly only three prokaryotic proteins are required to constitute a true post-translational circadian oscillator. The evolutionary history of the three Kai proteins indicates that KaiC is the oldest member and central component of the clock, with subsequent additions of KaiB and KaiA to regulate its phosphorylation state for time synchronization. The canonical KaiABC system in cyanobacteria is well understood, but little is known about more ancient systems that possess just KaiBC, except for reports that they might exhibit a basic, hourglass-like timekeeping mechanism. Here, we investigate the primordial circadian clock in *Rhodobacter sphaeroides* (RS) that contains only

KaiBC to elucidate its inner workings despite the missing KaiA. Using a combination X-ray crystallography and cryo-EM we find a novel dodecameric fold for KaiC<sub>RS</sub> where two hexamers are held together by a coiled-coil bundle of 12 helices. This interaction is formed by the C-terminal extension of KaiC<sub>RS</sub> and serves as an ancient regulatory moiety later superseded by KaiA. A coiled-coil register shift between daytime- and nighttime-conformations is connected to the phosphorylation sites through a long-range allosteric network that spans over 160 Å. Our kinetic data identify the difference in ATP-to-ADP ratio between day and night as the environmental cue that drives the clock and further unravels mechanistic details that shed light on the evolution of self-sustained oscillators.

### **Main Text:**

Circadian clocks are self-sustained biological oscillators that are found ubiquitously in prokaryotic and eukaryotic organisms. In eukaryotes these systems are complex and very sophisticated, whereas in prokaryotes the core mechanism is regulated by a posttranslational oscillator that can be reconstituted *in vitro* with three proteins (*kaiA*, *kaiB*, and *kaiC*)<sup>1</sup> and ATP. Seminal work on the KaiABC system resulted in a comprehensive understanding of its circadian clock: KaiC is the central component that auto-phosphorylates through binding of KaiA and auto-dephosphorylates upon association with KaiB<sup>2-5</sup>. The interplay between these three proteins has been shown *in vitro* to constitute a true circadian oscillator characterized by persistence, resetting, and temperature compensation. Consequently, the KaiABC system is considered an elegant and the simplest implementation of a circadian rhythm. The evolutionary history of *kai* genes established *kaiC* as the oldest member dating back ~3.5 bya, with subsequent additions of *kaiB* and most recently *kaiA* to form the extant *kaiBC* and *kaiABC* clusters, respectively<sup>6,7</sup>. Interestingly, a few studies of more



primitive organisms that lack *kaiA* hinted that the *kaiBC*-based systems might provide already a basic, hourglass-like timekeeping mechanism<sup>8-10</sup>. Contrary to the self-sustained oscillators found in cyanobacteria, such a timer requires an environmental cue to drive the clock and for the daily “flip” of the hourglass. The central role of circadian rhythms in many biological processes, controlled by the day and night cycle on earth, makes their evolution a fascinating topic.

Here, we investigate such a primitive circadian clock by biochemical and structural studies of the KaiBC system of the purple, non-sulfur photosynthetic proteobacterium *Rhodobacter sphaeroides* KD131 (RS; hereafter referred to as KaiB<sub>RS</sub> and KaiC<sub>RS</sub>). Surprisingly, the organism shows sustained rhythms of gene expression *in vivo*, but whether *kaiBC* is responsible for this observation remains inconclusive in the absence of a *kaiC* knockout<sup>11</sup>. A more recent study of the closely-related *Rhodospseudomonas palustris* demonstrated causality between the proto-circadian rhythm of nitrogen fixation and expression of the *kaiC* gene using a KO strain<sup>10</sup>. We discover using *in vitro* experiments that KaiBC<sub>RS</sub> is indeed a primordial circadian clock with a mechanism that is different from the widely studied circadian oscillator in *Synechococcus elongatus* PCC 7942 (hereafter referred to as KaiABC<sub>SE</sub>)<sup>2-5</sup>. We identify an environmental cue that regulates the phosphorylation state and consequently produces a 24-hour clock *in vivo* as the switch in ATP-to-ADP ratio between day and night. Our kinetic results combined with X-ray and cryo-EM structures of the relevant states unravel a long-range allosteric pathway that is crucial for function of the hourglass and sheds light on the evolution of self-sustained oscillators. Notably, we find a novel protein fold for KaiC<sub>RS</sub> and uncover a register shift in the coiled-coil domain spanning ~115 Å as the key regulator in this system, which shows intriguing structural similarities to dynein signaling<sup>12</sup>.

## C-terminal tail as a primitive regulatory moiety

To gain insight into the evolution of the *kaiBC* cluster, we constructed a phylogenetic tree of *kaiC* after the emergence of the *kaiB* gene (Fig. 1a, Extended Data Fig. 1a). The first obvious question is how KaiC<sub>RS</sub> and other members in the clade can auto-phosphorylate despite having no KaiA, which is known to be crucial for this function in the canonical KaiABC system at its optimum temperature. We observe a large clade that exhibits a C-terminal tail about 50 amino acids longer compared to *kaiC* in other clades (Extended Data Fig. 1b). This C-terminal extension near the A-loop is predominantly found in the *kaiC2* subgroup, which was previously annotated as having two serine phosphorylation sites instead of the Thr/Ser pair found in *kaiC1* and *kaiC3* subgroups (Extended Data Fig. 1b)<sup>13-15</sup>. In *Synechococcus elongatus*, the binding of KaiA<sub>SE</sub> to the A-loop of KaiC<sub>SE</sub> tethers them in an exposed conformation<sup>16</sup> that activates both auto-phosphorylation and nucleotide exchange<sup>17</sup>. Given the proximity of the extended C-terminal tail to the A-loop we conjectured that it could serve as the “primitive” regulatory moiety made redundant concomitantly with the appearance of KaiA.

To test our hypothesis, we first measured the auto-phosphorylation and nucleotide exchange rates in KaiC<sub>RS</sub> that both depend heavily on the presence of KaiA in the KaiABC<sub>SE</sub> system. We observe an auto-phosphorylation rate for KaiC<sub>RS</sub> that is ~16-fold higher than for KaiC<sub>SE</sub> activated by KaiA<sub>SE</sub> ( $6.5 \pm 1.0 \text{ h}^{-1}$  versus  $0.40 \pm 0.02 \text{ h}^{-1}$ , respectively; Fig. 1b and Extended Data Figs. 2a-e). Similarly, the nucleotide exchange is faster in KaiC<sub>RS</sub> compared to KaiC<sub>SE</sub> even in the presence of KaiA<sub>SE</sub> ( $18.0 \pm 1.5 \text{ h}^{-1}$  compared to  $4.7 \pm 0.3 \text{ h}^{-1}$ , respectively; Fig. 1c and Extended Data Fig. 2f). Our data clearly show that KaiC<sub>RS</sub> can perform both auto-phosphorylation and nucleotide exchange on its own and, in fact, does so faster than its more recently evolved counterparts.

## Coiled-coil interaction assembles KaiC<sub>RS</sub> dodecamer

To assess mechanistically how KaiC in the *kaiA*-lacking systems accomplishes auto-phosphorylation we turned to structural biology. The crystal structure of KaiC<sub>RS</sub>, unlike KaiC from cyanobacteria, reveals a homododecamer consisting of two homohexameric domains joined by a twelve-helical coiled-coil domain that is formed by the extended C-terminal tail (PDB 8dba; Fig. 1d and Extended Data Table 1). A closer inspection of the CII domains in KaiC<sub>RS</sub> and KaiC<sub>SE/TE</sub> showed an obvious difference in A-loop orientations: an extended conformation in KaiC<sub>RS</sub> versus a buried orientation in KaiC<sub>SE/TE</sub> (Fig. 1e). The existence of such an extended conformation upon binding of KaiA was conjectured earlier based on the perceived hyper- and hypo-phosphorylation upon removing the A-loop or disrupting KaiA binding, respectively<sup>18</sup>. Importantly, a recent cryo-EM structure of the nighttime phosphomimetic KaiC<sub>SE</sub> S431E/T432A in its compressed state was solved and directly showed a disordered A-loop that no longer interacts with the 422-loop<sup>19</sup>, similar to the extended A-loop conformation we observe in KaiC<sub>RS</sub> (Fig. 1e). The loss of interaction between the A-loop and 422-loop (just 10 residues apart from the phosphorylation sites), results in closer proximity between the hydroxyl group of Ser<sup>431</sup>/Thr<sup>432</sup> and the  $\gamma$ -phosphate of ATP, thereby, facilitating the phosphoryl-transfer step<sup>20</sup>. Furthermore, the sequence similarity between KaiC<sub>RS</sub> and KaiC<sub>SE</sub> is less than 30% for the A-loop and residues considered important for stabilization of this loop in its buried orientation (i.e., 422-loop and residues 438-444; Fig. 1e). Taken together, our structural and kinetic data support the idea that an exposed A-loop is key for KaiA-independent enhancement of nucleotide exchange and hence auto-phosphorylation in KaiC<sub>RS</sub> and perhaps other KaiBC-based systems.

Is the purpose of the coiled-coil domain merely to “pull up” the A-loop or does it actively participate in nucleotide exchange and auto-phosphorylation of KaiC? To further understand its

role, we generated a truncation at residue Glu<sup>490</sup> based on the phylogenetic tree and crystallographic information (KaiC<sub>RS</sub>- $\Delta$ coil; Extended Data Fig. 1b) to disrupt the coiled-coil interaction between the two hexamers. Indeed, the crystal structure of KaiC<sub>RS</sub>- $\Delta$ coil (PDB 8db3; Fig. 2a,b and Extended Data Table 1) and its size-exclusion chromatogram and analytical ultracentrifugation profile (Extended Data Fig. 3a-c) show a hexameric structure with no coiled-coil interaction. Nucleotide exchange rates in the CII domain for KaiC<sub>RS</sub>- $\Delta$ coil and wild type are comparable ( $19.1 \pm 0.8 \text{ h}^{-1}$  and  $18.0 \pm 1.5 \text{ h}^{-1}$ , respectively; Extended Data Fig. 3d) as are the phosphorylation rates ( $5.5 \pm 0.4 \text{ h}^{-1}$  and  $7.4 \pm 0.3 \text{ h}^{-1}$  for KaiC<sub>RS</sub>- $\Delta$ coil and wild type, respectively; Extended Data Fig. 3e,f). These results indicate that the extended A-loop and not the coiled-coil interaction plays a pivotal role in nucleotide exchange and auto-phosphorylation in KaiC<sub>RS</sub>, potentially explaining auto-phosphorylation in other KaiBC-based systems lacking a coiled-coil bundle. Notably, the coiled-coil bundle provides additional hexameric stability: the KaiC<sub>RS</sub> dodecamer is stable for extended periods of time in the presence of only ADP (Extended Data Fig. 3g,h), whereas for KaiC<sub>SE</sub> oligomers are not observed under these conditions<sup>21</sup>.

### **Long-range allosteric network in KaiC<sub>RS</sub>**

The change in phosphorylation state of KaiC has been well established to be the central feature for the circadian rhythm<sup>22,23</sup>. Interestingly, when comparing the unphosphorylated form of full-length KaiC<sub>RS</sub> (PDB 8dba) and its phosphomimetic mutant (S413E/S414E, PDB xxxx, Extended Data Fig. 4, and Extended Data Table 2) we observe two distinct coiled-coil interactions. Upon phosphorylation, the coiled-coil pairs swap partners by interacting with the other neighboring chain from the opposite hexamer resulting in a register shift that propagates  $\sim 115 \text{ \AA}$  along the

entire coiled-coil (Fig. 2c and Extended Data Fig. 5). In the phosphomimetic state, the register comprises bulkier hydrophobic residues thus resulting in a more stable interaction than for the dephosphorylated form (Fig. 2d and Extended Data Fig. 3g). Furthermore, the C-terminal residues of Kai<sub>CRS</sub>-S413E/S414E interact with the CII domain of the opposite hexamer, whereas the lack of electron density for the last 30 residues in the wild-type structure indicates more flexibility in the dephosphorylated state. Importantly, we discover that these conformational changes in the coiled-coil domain seem to be coupled through a long-range allosteric network to the phosphorylation sites. The rotameric states of residues Ser<sup>413</sup>, Ser<sup>414</sup>, Trp<sup>419</sup>, Val<sup>421</sup>, Tyr<sup>436</sup>, Leu<sup>438</sup>, Val<sup>449</sup>, and Arg<sup>450</sup> move concertedly and point towards the nucleotide-binding site when the protein is phosphorylated or away in the absence of a phosphate group (Fig. 2e, Extended Data Fig. 5d). We hypothesize that the proximity of the nucleotide to the phosphorylated residue allows for a more efficient phosphoryl transfer and, therefore, determined experimentally the impact of the coiled-coil domain on the auto-dephosphorylation of Kai<sub>CRS</sub>. Indeed, we observe a noticeable effect: wild-type protein dephosphorylates comparatively quickly ( $k_{\text{obs}} = 11.5 \pm 0.8 \text{ h}^{-1}$ ) in the presence of only ADP, whereas little dephosphorylation was observed for Kai<sub>CRS</sub>- $\Delta$ coil (Fig. 2f and Extended Data Fig. 3i) where the allosteric propagation is disrupted (Extended Data Fig. 5d). Consistent with this accelerated dephosphorylation due to the coiled-coil domain, our crystallographic data show a phosphate-group on Ser<sup>414</sup> for Kai<sub>CRS</sub>- $\Delta$ coil but not for the wild-type protein (Fig. 2a and Extended Data Fig. 5d).

## ATP-to-ADP ratio to reset the clock

The surprising result here is that KaiC<sub>RS</sub> can auto-dephosphorylate on its own despite being constitutively active for phosphorylation due to its extended A-loop conformation. In the canonical *kaiABC* system, the interaction between KaiB and KaiC is required to provide a new binding interface which sequesters KaiA from its “activating” binding site, thereby promoting auto-dephosphorylation at the organism’s optimum temperature<sup>24-26</sup>. The obvious next questions are whether the KaiC<sub>RS</sub> system can oscillate and secondly if there is a regulatory role for KaiB<sub>RS</sub> in this process. Comparing the *in vitro* phosphorylation states of KaiC<sub>RS</sub> in the absence and presence of KaiB<sub>RS</sub> shows an initial, fast phosphorylation followed by an oscillatory-like pattern in the presence of KaiB<sub>RS</sub> (hereafter referred to as KaiBC<sub>RS</sub>), whereas KaiC<sub>RS</sub> alone remains phosphorylated (Fig. 3a,b). Interestingly, the ATP consumption during the reaction with KaiB<sub>RS</sub> is significantly higher than without (Fig. 3a) and we have seen earlier that KaiC<sub>RS</sub> will dephosphorylate completely in the presence of only ADP (*cf.* Fig. 2f). These results suggest that the phosphorylation state of KaiC<sub>RS</sub> and thus the observed oscillatory half-cycle (Fig. 3a,b), is likely related to a change in ATP-to-ADP ratio and we conjectured this could constitute the environmental cue to reset the timer. To test our hypothesis, an ATP-recycling system was added after complete dephosphorylation of KaiBC<sub>RS</sub> and, as predicted, KaiC<sub>RS</sub> was able to restart the cycle and phosphorylate again (Extended Data Fig. 6a). Naturally, *in vivo* the ATP-to-ADP ratio will not vary as drastically as in this *in vitro* experiment since nucleotide homeostasis is tightly regulated. To mimic the day- and night-period for *Rhodobacter sphaeroides* we repeated the experiments while keeping the ATP-to-ADP ratio constant (mostly ATP at daytime due to photosynthesis versus 25:75% ATP:ADP during nighttime, respectively)<sup>27</sup>. In the presence of high ATP (i.e., mimicking daytime) KaiC<sub>RS</sub> remains singly or doubly phosphorylated (Fig. 3c and

Extended Data Fig. 6b) irrespective of KaiB<sub>RS</sub>, whereas a constant 25:75% ATP-to-ADP ratio (i.e., mimicking nighttime) results in a much higher fraction of dephosphorylated KaiC<sub>RS</sub> in the presence of KaiB<sub>RS</sub> (Fig. 3c). Moreover, when the ATP-to-ADP ratio is flipped to mimic the daytime, KaiC<sub>RS</sub> is able to phosphorylate again (*cf.* Fig. 3c; around the 28-hour mark). Our data support the notion that the phosphorylation behavior depends strongly on the ATP-to-ADP ratio and, more importantly, demonstrate that the physical binding of KaiB<sub>RS</sub> results in a higher level of KaiC<sub>RS</sub> dephosphorylation at nighttime.

Next, we investigated the accelerated ATPase activity in KaiC<sub>RS</sub> upon complex formation. The ATPase activity reported for KaiC<sub>SE</sub> is very low ( $\sim 15$  ATP molecules day<sup>-1</sup> molecule<sup>-1</sup> KaiC<sub>SE</sub>) and was proposed as a reason for the “slowness”<sup>28</sup>. KaiC<sub>RS</sub> alone already shows a significantly faster ATPase rate that gets further enhanced by binding of KaiB<sub>RS</sub> ( $208 \pm 19$  and  $1,557 \pm 172$  ATP molecules day<sup>-1</sup> KaiC<sub>RS</sub><sup>-1</sup>, respectively; left two bars in Fig. 3d and Extended Data Fig. 6c-g). Furthermore, KaiC<sub>RS</sub> exhibits no temperature compensation for its ATPase activity ( $Q_{10} \sim 1.9$ ; Extended Data Fig. 6c), a feature that is present in KaiC<sub>SE</sub> and proposed to be a prerequisite for self-sustained rhythms<sup>28</sup>. The deviation from unity for  $Q_{10}$  is consistent with our earlier observation that the KaiB<sub>RS</sub> system is not a true circadian oscillator but rather an hourglass-timer (*cf.* Fig. 3b).

### **Regulatory role of KaiB<sub>RS</sub>**

The mechanistic details of how KaiB binding in the CI domain allosterically affects the auto-dephosphorylation of KaiC<sub>RS</sub> in the CII domain remain unclear. Intuitively, there are three plausible scenarios to explain this, namely that KaiB<sub>RS</sub> binding (i) stimulates the phosphoryl-

transfer from pSer back to ADP (Extended Data Fig. 7a), (ii) increases the hydrolysis rate of the active-site ATP (Extended Data Fig. 8a), or (iii) accelerates the nucleotide exchange in the CII domain (Extended Data Fig. 8e). To differentiate between these possibilities, we performed radioactivity experiments to follow nucleotide interconversion, measured ATPase activity for wild-type KaiC<sub>RS</sub> and mutant forms that are incapable of ATPase activity in the CI or CII domain, and quantified nucleotide-exchange rates by fluorescence using mant-ATP. First, we detected fast, transient <sup>32</sup>P-ATP formation in our radioactivity experiments when starting from <sup>32</sup>P-phosphorylated KaiC<sub>RS</sub> due to its ATP-synthase activity in the CII domain (Fig. 3e and Extended Data Fig. 7b-d). The observed phosphoryl-transfer rate is independent of KaiB<sub>RS</sub> ( $k_{\text{obs}} = 12.0 \pm 1.7 \text{ h}^{-1}$  and  $15.4 \pm 1.7 \text{ h}^{-1}$  in its absence and presence, respectively; Fig. 3f) and agrees well with the rates determined from our gel electrophoresis experiments ( $11.0 \pm 0.8 \text{ h}^{-1}$  and  $11.5 \pm 0.8 \text{ h}^{-1}$  with/without KaiB<sub>RS</sub>, respectively; Extended Data Fig. 7e,f). Our experimental data confirm that KaiC<sub>RS</sub> undergoes dephosphorylation via an ATP-synthase mechanism similarly to what was observed for KaiC<sub>SE</sub><sup>29</sup>; KaiB does not expedite the actual phosphoryl-transfer reaction, which is never the rate-limiting step. Since we were unable to stabilize the first phosphorylation site (Ser<sup>414</sup>) in the presence of ADP, the rates reported here correspond exclusively to dephosphorylation of Ser<sup>413</sup>. Secondly, to deconvolute the contributions of the CI and CII domains to the observed ATPase activity, we measured ADP production by KaiC<sub>RS</sub> mutants that abolish hydrolysis in either the CI (KaiC<sub>RS</sub>-E62Q/E63Q) or CII (KaiC<sub>RS</sub>-E302Q/E303Q) domain. For wild-type KaiC<sub>RS</sub>, the binding of KaiB<sub>RS</sub> results in a 7.5-fold increase in ATPase activity, and we show that both domains are affected and contribute additively (3-fold for CI and at least 1.7-fold for CII, respectively) to the overall effect (Fig. 3d and Extended Data Fig. 8b-d). Of note, the fold increase in the CII domain represents a lower limit since the KaiC<sub>RS</sub>-E62Q/E63Q mutations interfere with KaiB<sub>RS</sub>



binding as reported before for KaiC<sub>SE</sub><sup>30</sup>. Thirdly, our measurements of the nucleotide exchange rate show that it is also unaffected by KaiB<sub>RS</sub> binding ( $19.8 \pm 1.8 \text{ h}^{-1}$  and  $18.0 \pm 1.5 \text{ h}^{-1}$  with/without, respectively; Fig. 3g); since there is no Trp residue near the nucleotide binding site in the CI domain, only the exchange rate in the CII domain could be determined. Interestingly, the change in fluorescence amplitude is much smaller in the presence of KaiB<sub>RS</sub>, demonstrating that even though the binding of KaiB<sub>RS</sub> does not accelerate nucleotide exchange, it appears to induce a conformational rearrangement in the CII domain especially at higher temperature (Fig. 3g and Extended Data Fig. 8f-h).

### **Structure of KaiB<sub>RS</sub> complex**

To elucidate the structural underpinning of the faster ATPase activity upon KaiB<sub>RS</sub> binding, we solved the cryo-EM structures of KaiC<sub>RS</sub> alone (PDB xxxx) and in complex with KaiB<sub>RS</sub> (PDB xxxx) (Extended Data Table 2). Twelve KaiB<sub>RS</sub> molecules (monomeric in solution, Extended Data Fig. 9a) bind to the CI domain of the KaiC<sub>RS</sub>-S413E/S414E dodecamer (Fig. 4a-c and Extended Data Fig. 9b). The bound state of KaiB<sub>RS</sub> adopts the same “fold-switch” conformation as observed for KaiB<sub>TE</sub><sup>25</sup> and suggests that this is the canonical binding-competent state (Fig. 4b). Upon binding of KaiB<sub>RS</sub>, the CI-CI interfaces loosen up (Fig. 4c), which allows for the formation of a tunnel that connects bulk solvent to the position of the hydrolytic water in the active sites (Fig. 4d and Extended Data Fig. 9c). There are other lines of evidence for the weakened interactions within the CI domains. First, KaiB<sub>RS</sub> binding to either KaiC<sub>RS</sub>-CI domain (Extended Data Fig. 10a) or KaiC<sub>RS</sub>- $\Delta$ coil (i.e., missing the C-terminal extensions; Extended Data Fig. 10b) results in disassembly of the hexameric KaiC<sub>RS</sub> structure into its monomers. In contrast, full-length KaiC<sub>RS</sub> maintains its oligomeric state upon binding of KaiB<sub>RS</sub> likely due to the stabilization provided by

the coiled-coil interaction. Secondly, a decrease in melting temperature ( $T_M$ ) of KaiC<sub>RS</sub> is observed with increasing KaiB<sub>RS</sub> concentration (Extended Data Fig. 10c). There is no interaction between neighboring KaiB<sub>RS</sub> molecules within the complex (Extended Data Fig. 9b), suggesting a non-cooperative assembly of KaiB<sub>RS</sub> to KaiC<sub>RS</sub> contrary to what is observed for the KaiBC<sub>SE/TE</sub> complex<sup>31,32</sup>.

Furthermore, we noticed that KaiB-bound structures in phosphomimetic variants of KaiC<sub>RS</sub> (Fig. 4c,d) and KaiC<sub>SE</sub><sup>26</sup> have ADP bound in their CI domain, demonstrating that the post-hydrolysis state is also the binding-competent state for KaiB<sub>RS</sub>. To test this hypothesis, a His-tagged KaiB<sub>RS</sub> protein was used in pull-down assays to detect its physical interaction with wild-type and mutant forms of KaiC<sub>RS</sub> bound with either ADP or ATP. Nearly all KaiB<sub>RS</sub> is complexed to ADP-bound KaiC<sub>RS</sub>, whereas less than 30% co-elutes in the ATP-bound form regardless of the phosphorylation state (Fig. 4e and Extended Data Fig. 10d,e). The complex formation depends inversely on the ATP-to-ADP ratio (Extended Data Fig. 10f). We performed fluorescence anisotropy competition experiments for a more quantitative description of the binding interaction between KaiC<sub>RS</sub> and KaiB<sub>RS</sub>: very similar  $K_D$  values were obtained for unphosphorylated, wild-type KaiC<sub>RS</sub> (Fig. 4f) and its phosphomimetic form (Extended Data Fig. 10g) bound with ADP ( $0.42 \pm 0.03 \mu\text{M}$  and  $0.79 \pm 0.06 \mu\text{M}$ , respectively). No measurable binding curves were obtained for ATP-bound phosphorylated wild-type KaiC<sub>RS</sub> (Fig. 4f) or KaiC<sub>RS</sub>-S413E/S414E (Extended Data Fig. 10g) with ATP-recycling system, likely due to the small fraction of complex present. Our data show that the post-hydrolysis state in the CI domain is key for KaiB<sub>RS</sub> binding, whereas the phosphorylation state of KaiC<sub>RS</sub> has only a marginal effect.

In summary, we unequivocally demonstrate that binding of KaiB<sub>RS</sub> at the CI domain in the post-hydrolysis state facilitates the hydrolysis of transiently formed ATP after dephosphorylation

of KaiC<sub>RS</sub> in the CII domain (Fig. 4g). Our fluorescence experiments (Fig. 3g and Extended Data Fig. 8f) detect a conformational change in the CII domain upon KaiB<sub>RS</sub> binding, but we do not observe major structural changes in the cryo-EM structures. Based on the temperature dependence of the fluorescence amplitudes (Extended Data Fig. 8f) we conjecture that the inability to detect conformational differences is likely because of the low temperature. Since the CII domain prefers to bind ATP over ADP (Extended Data Fig. 10h), ATP hydrolysis in the CII domain stimulated by KaiB<sub>RS</sub> is particularly important to keep KaiC<sub>RS</sub> in its dephosphorylated state at nighttime, where the exogenous ATP-to-ADP ratio remains sufficiently high to otherwise result in ATP-binding in the CII active site (*cf.* Fig. 3c and Extended Data Fig. 6b).

## Discussion

The KaiB<sub>RS</sub> system studied here represents a primordial, hourglass timekeeping machinery and its mechanism provides insight into more evolved circadian oscillators like KaiABC. The dodecameric KaiC<sub>RS</sub> shows constitutive kinase-activity due to its extended C-terminal tail that forms a coiled-coil bundle with the opposing hexamer and elicits a conformation akin to the exposed A-loop conformation in KaiA<sub>SE</sub>, and auto-phosphorylation occurs within half an hour. In the KaiABC<sub>SE</sub> system, the transition from unphosphorylated to doubly phosphorylated KaiC takes place over about twelve hours and the fine-tuning of this first half of the circadian rhythm is accomplished by the emergence of KaiA<sub>SE</sub> during evolution. The second clock protein, KaiB, binds at the CI domain with the same “fold-switched” state in both systems. The interaction is controlled by the phosphorylation state in the KaiABC<sub>SE</sub> system, and its sole function is to sequester KaiA<sub>SE</sub> from the “activating” binding site, whereas KaiB binding directly accelerates the ATPase activity in the KaiB<sub>RS</sub> system regardless of the phosphorylation state. The KaiB<sub>RS</sub>

system requires an environmental switch in ATP-to-ADP concentration to reset the clock and thus follows the day-night schedule when nucleotide concentrations inherently fluctuate in the organism. By contrast, the self-sustained oscillator KaiABC<sub>SE</sub> remains functional over a wide range of nucleotide concentrations and responds to changes in the ATP-to-ADP ratio by changing its phosphorylation period and amplitude to remain entrained with the day and night cycle<sup>33</sup>.

The novel structural fold of KaiC utilizes the versatile coiled-coil architecture as part of a long-range allosteric network that regulates KaiC<sub>RS</sub> dephosphorylation. Nature uses conformational changes in coiled-coil domains for a variety of regulatory functions<sup>34</sup>, including the activity of the motor protein dynein in cellular transport of cargo along the actin filament<sup>12</sup>. A similar register shift, although in a coiled-coil interaction formed by only two helices is used in dynein motility. Given that this simple heptad repeat sequence emerged multiple times and is found throughout all kingdoms of life<sup>35</sup> it is an example of convergent evolution.

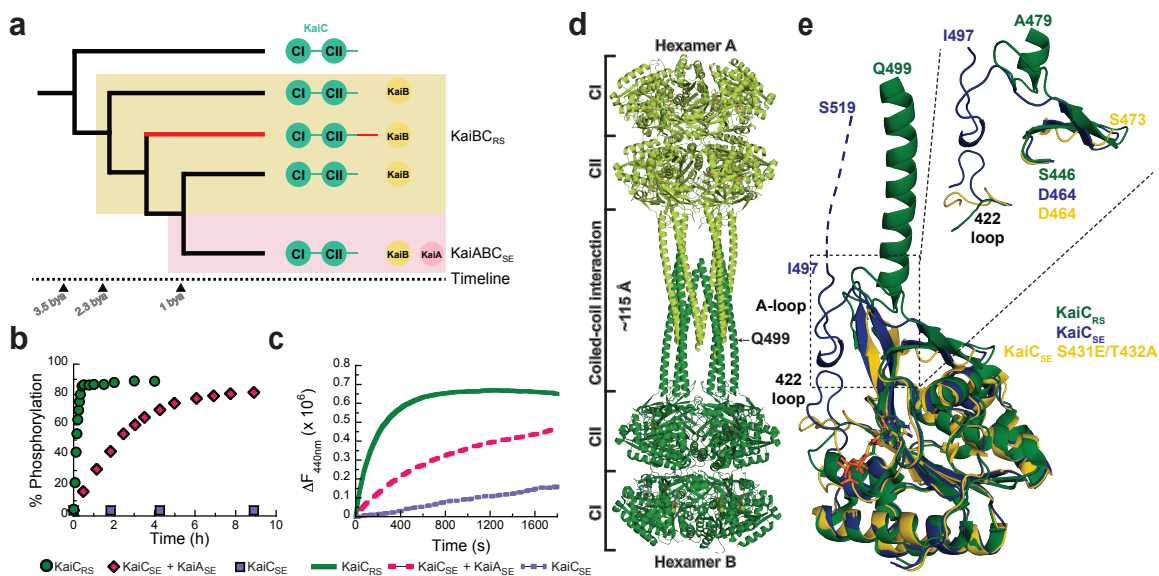

**Fig. 1. Extended C-terminal tail of KaiC<sub>RS</sub> forms a coiled-coil interaction with an exposed A-loop for KaiA-independent phosphorylation of KaiC.** (a) Schematic phylogenetic tree of *kaiC* showing the appearance of *kaiB* and *kaiA* during evolution. The *kaiC* clade with an approximately 50 amino acids C-terminal extension is labeled in red and a timeline was predicted as previously reported<sup>6</sup> (b) Phosphorylation over time of KaiC<sub>RS</sub> (green circles,  $6.5 \pm 1.0 \text{ h}^{-1}$ ) and KaiC<sub>SE</sub> in the presence (pink circles,  $0.40 \pm 0.02 \text{ h}^{-1}$ ) or absence (purple circles) of KaiA<sub>SE</sub> at 30 °C. The standard deviation in reported parameters are obtained from the fitting. (c) Nucleotide exchange between ATP and mant-ATP in KaiC<sub>RS</sub> alone (green trace,  $18.0 \pm 1.5 \text{ h}^{-1}$ ) compared to KaiC<sub>SE</sub> in the presence (pink trace,  $4.7 \pm 0.3 \text{ h}^{-1}$ ) and absence of KaiA<sub>SE</sub> (purple trace,  $0.08 \pm 0.04 \text{ h}^{-1}$ ) measured by fluorescence at 30 °C. Representative traces are shown and the fitted parameters (mean  $\pm$  S.D) were obtained from three replicate measurements. (d) X-ray structure of dodecameric KaiC<sub>RS</sub> (PDB 8dba) colored by hexamer A (light green) and hexamer B (dark green). The CI, CII, and coiled-coil domains are indicated in (a), and the A-loop is labeled in (e). (e) Superposition based on alignment of the CII domain of KaiC<sub>RS</sub> (green, PDB 8dba, chain B), KaiC<sub>SE</sub> (purple, PDB 1tf7, chain B)<sup>36</sup>, and KaiC<sub>SE</sub> S431E/T432A (yellow, PDB 7s65, chain A)<sup>19</sup> shows that KaiC<sub>RS</sub> has an extended A-loop orientation that no longer forms the inhibitory interaction with the 422-loop (KaiC<sub>SE</sub> numbering). The conformation of the 422-loop in KaiC<sub>RS</sub> resembles the one seen in the cryo-EM structure of the phosphomimetic KaiC<sub>SE</sub> S431E/T432A (yellow, PDB 7s65)<sup>19</sup>. No electron density is observed for the C-terminal part of wild-type KaiC<sub>SE</sub> and S431E/T432A mutant due to flexibility, and the missing 22 residues for wild-type KaiC<sub>SE</sub> (46 for S431E/T432A) are represented by a dashed line for wild-type KaiC<sub>SE</sub> (not shown for the mutant).

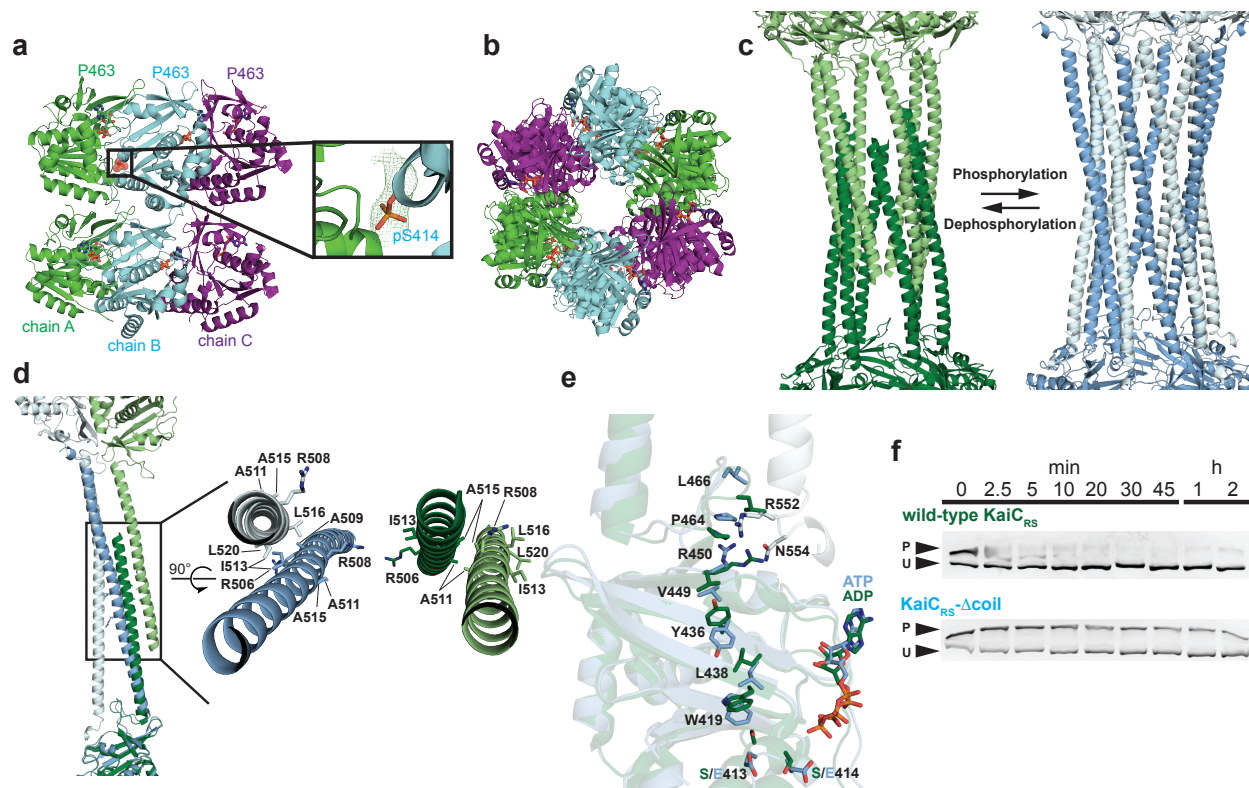

**Fig. 2. Coiled-coil partner switch coupled to an allosteric network in the CII domain promotes auto-dephosphorylation.** (a) The X-ray structure of KaiC<sub>RS</sub>- $\Delta$ coil was solved in the C222<sub>1</sub> space group and contained three monomers in the asymmetric unit with ADP present in all active sites. The obtained electron density map allowed for model building up to Pro<sup>463</sup>, indicating that the truncation at position 490 results in enhanced flexibility beyond Pro<sup>463</sup>. Phosphorylation of Ser<sup>414</sup> was observed in chain B (cyan) as shown by the electron density mFo-DFc polder map (green mesh, 3 $\sigma$  contour level). (b) Assembly analysis using the PISA software<sup>37</sup> revealed a hexamer as the most probable quaternary structure (top view). (c) Structural comparison of the coiled-coil domain for unphosphorylated KaiC<sub>RS</sub> (dark and light green; X-ray structure) and the KaiC<sub>RS</sub>-S413E/S414E phosphomimetic mutant (dark and light blue; cryo-EM structure). (d) Overlay of interacting dimers of the structures in (c) using CII domain of chain A as reference (dark shades; bottom). Unphosphorylated KaiC<sub>RS</sub> (dark green) interacts with the opposite partner on the right (light green), whereas KaiC<sub>RS</sub>-S413E/S414E (dark blue) interacts with the partner on the left (light blue). The hydrophobic packing in the coiled-coil domain is mediated by only the C $\beta$  atoms of alanine and arginine residues in unphosphorylated KaiC<sub>RS</sub> but involves the entire side chain of leucine and isoleucine residues in the phosphomimetic structure. (e) Allosteric network in the phosphomimetic state (blue) from the coil (light blue) propagating through the KaiC<sub>RS</sub> CII domain to the active site (dark blue) compared to the unphosphorylated state (dark green). (f) Auto-dephosphorylation of KaiC<sub>RS</sub> and KaiC<sub>RS</sub>- $\Delta$ coil over time in the presence of 4 mM ADP at 30 °C. The phosphorylated (P) and unphosphorylated (U) proteins were separated by Zn<sup>2+</sup> Phos-tag<sup>TM</sup> SDS-PAGE.



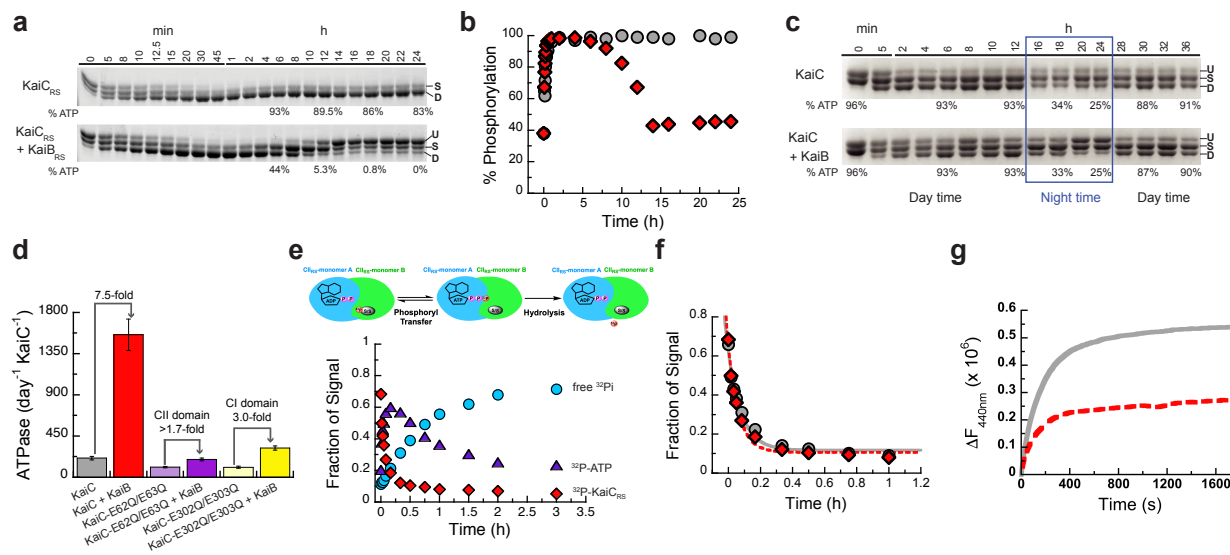

**Fig. 3. The regulatory role of KaiB<sub>RS</sub> in the phosphorylation/dephosphorylation cycle of KaiC<sub>RS</sub>.** **(a)** SDS-PAGE gel of 3.5 μM KaiC<sub>RS</sub> and 4 mM ATP in the absence (upper gel) and presence (lower gel) of 3.5 μM KaiB<sub>RS</sub> at 35 °C with the percentage of ATP indicated at specific time points. U, S, and D represent unphosphorylated, singly, and doubly phosphorylated KaiC<sub>RS</sub>, respectively. **(b)** Phosphorylation (single + double) of KaiC<sub>RS</sub> during the reaction in the absence (gray circles) or presence (red diamonds) of KaiB<sub>RS</sub> demonstrates its role in the dephosphorylation of KaiC<sub>RS</sub>. **(c)** Phosphorylation-dephosphorylation cycle of 3.5 μM phosphorylated KaiC<sub>RS</sub> in the absence and presence of 3.5 μM KaiB<sub>RS</sub> in a constant ATP-to-ADP ratio of high ATP (4 mM) to mimic daytime and about 25% ATP to mimic the nighttime (exact percentage of ATP indicated at specific time points) at 30 °C. U, S, and D in both panels represent the unphosphorylated, singly phosphorylated (at Ser<sup>413</sup> or Ser<sup>414</sup>), and doubly phosphorylated state of KaiC<sub>RS</sub>, respectively. These data show that the physical binding of KaiB<sub>RS</sub> is crucial to dephosphorylate KaiC<sub>RS</sub> at nighttime where ATP concentrations are still sufficiently high to otherwise keep KaiC<sub>RS</sub> in the phosphorylated state. **(d)** ATPase activity of wild-type KaiC<sub>RS</sub> in the absence (gray bar) and presence (red bar) of KaiB<sub>RS</sub>, KaiC<sub>RS</sub>-E62Q/E63Q in the absence (light purple bar) and presence (dark purple bar) of KaiB<sub>RS</sub>, and KaiC<sub>RS</sub>-E302Q/E303Q in the absence (light yellow bar) and presence (dark yellow bar) of KaiB<sub>RS</sub> at 30 °C. Bar graphs show mean ± S.D from three replicates. **(e)** Time-dependent auto-dephosphorylation of <sup>32</sup>P-labeled KaiC<sub>RS</sub> bound with ADP in the presence of 20 μM KaiB<sub>RS</sub> and 4 mM ADP at 30 °C showing phosphorylated <sup>32</sup>P-KaiC<sub>RS</sub> (red diamonds), <sup>32</sup>P-ATP (purple triangles), and free <sup>32</sup>Pi (cyan circles). The reaction products were separated by TLC. **(f)** The decay of phosphorylated <sup>32</sup>P-KaiC<sub>RS</sub> bound with 4 mM ADP in the absence (gray circles) and presence (red diamonds) of KaiB<sub>RS</sub> at 30 °C is obtained from autoradiography quantification (see Extended Data Fig. 7). **(g)** The nucleotide exchange of 3.5 μM KaiC<sub>RS</sub> (gray trace) and 3.5 μM KaiC<sub>RS</sub> in complex with 30 μM KaiB<sub>RS</sub> (red dotted trace) in the presence of ATP with mant-ATP. The proteins were incubated at 30 °C for 24 h before the addition of mant-ATP. Representative traces are shown and the fitted parameters (mean ± S.D) were obtained from three replicate measurements.

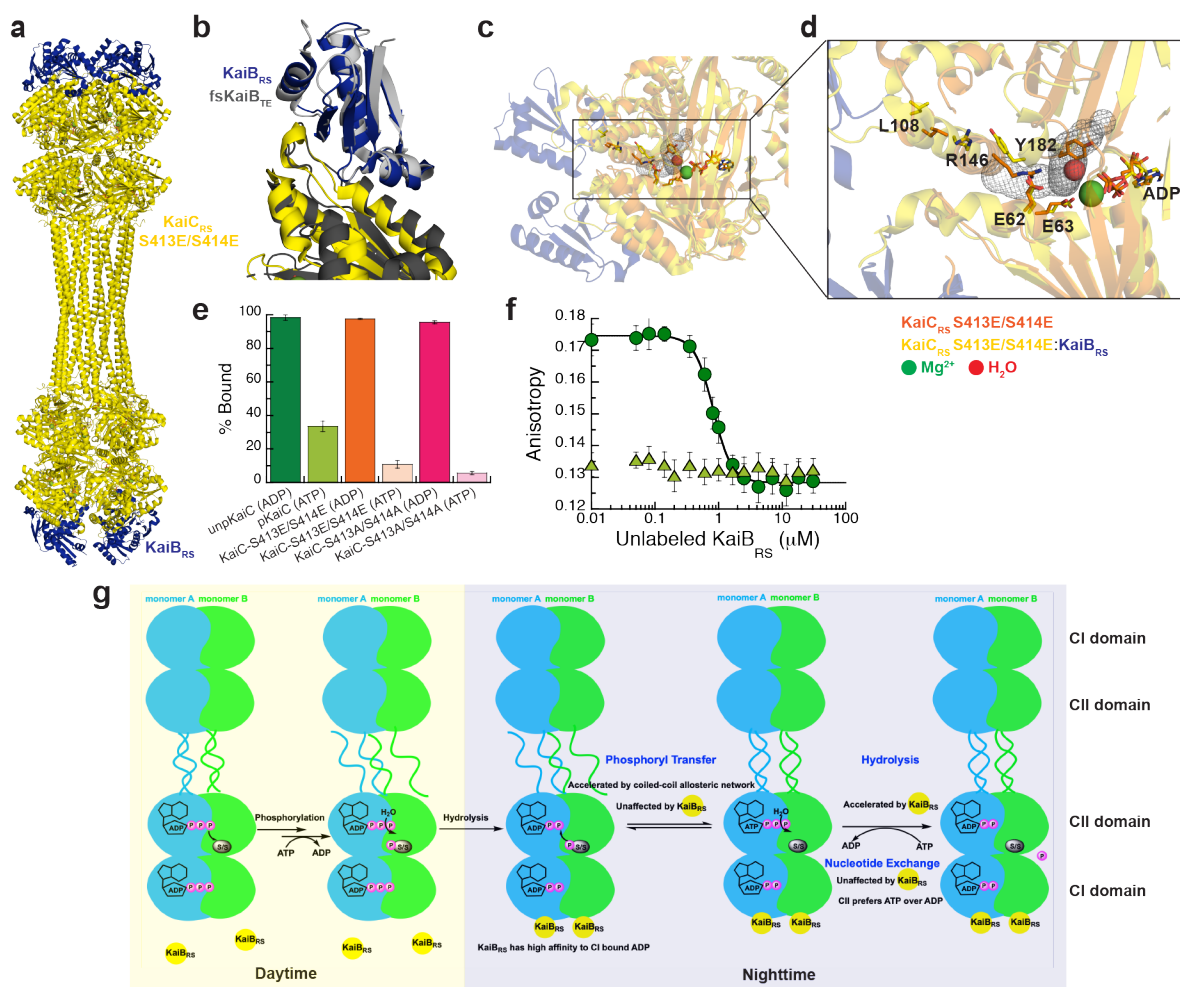

**Fig. 4. KaiB<sub>RS</sub> binds to post-hydrolysis state and accelerates the ATPase activity of KaiC<sub>RS</sub>.** (a) Cryo-EM structure of KaiC<sub>RS</sub>-S413E/S414E (yellow) in complex with KaiB<sub>RS</sub> (blue) (PDB xxx). (b) Superposition of KaiC<sub>RS</sub>-S413E/S414E (yellow) bound to KaiB<sub>RS</sub> (blue) (PDB xxx) and KaiC<sub>TE</sub>-S413E (dark gray) bound to fsKaiB<sub>TE</sub> (light gray) (PDB 5jwq<sup>26</sup>). (c, d) Binding of KaiB<sub>RS</sub> (blue) creates a tunnel (gray mesh) that enables water to reach the catalytic position (red sphere) for ATP hydrolysis in the CI domain. (e) Binding of wild-type and mutants forms of KaiC<sub>RS</sub> to His-tagged KaiB<sub>RS</sub> in the presence of ADP or ATP/recycling system at 25 °C. Bar graphs show mean ± S.D. from three replicates. (f) Fluorescence anisotropy of unlabeled KaiB<sub>RS</sub> competitively displacing KaiB<sub>RS</sub>-6IAF (where 6IAF is the fluorophore) from unphosphorylated KaiC<sub>RS</sub> in the presence of ADP (dark green circles) and phosphorylated KaiC<sub>RS</sub> in the presence of the ATP/recycling system (light green triangles) at 30 °C. The average anisotropy and standard error were calculated from ten replicate measurements. (g) Schematic diagram of the uncovered mechanism of KaiC<sub>RS</sub> regulated by coiled-coil interaction and KaiB<sub>RS</sub> in the CI and CII domain.



**Data availability:** Structure factors and refined models are deposited in the Protein Data Bank (PDB) under accession codes 8dba (wild-type KaiC<sub>RS</sub>, x-ray), 8db3 (KaiC<sub>RS</sub>- $\Delta$ coil, x-ray), xxxx (KaiC<sub>RS</sub>-S413E/S414E, cryo-EM), and xxxx (KaiC<sub>RS</sub>-S413E/S414E:KaiB<sub>RS</sub>, cryo-EM), respectively. Cryo-EM maps are deposited in the Electron Microscopy Data Bank (EMDB) under accession codes xxxx (KaiC<sub>RS</sub>-S413E/S414E) and xxxx (KaiC<sub>RS</sub>-S413E/S414E:KaiB<sub>RS</sub>), respectively.

### **Acknowledgements:**

D.K. and N.G. are supported by the Howard Hughes Medical Institute (HHMI). We would like to thank Mike Rigney for assistance with negative-stain data collection at the Brandeis University Electron Microscopy Facility, and Zhiheng Yu and the staff of the Janelia Research Campus cryo-EM facility for advice and assistance with data collection. The Berkeley Center for Structural Biology is supported in part by HHMI. Beamline 8.2.1 of the Advanced Light Source, a U.S. DOE Office of Science User Facility under Contract No. DE-AC02-05CH11231, is supported in part by the ALS-ENABLE program funded by the National Institutes of Health, National Institute of General Medical Sciences, grant P30 GM124169-01. Mass spectral data were obtained at the University of Massachusetts Mass Spectrometry Core Facility, RRID:SCR\_019063.

**Author contributions:** W.P., R.A.P.P., and D.K. conceived the project and designed experiments. W.P. performed and analyzed all biochemical data. W.P. and R.A.P.P. set up the crystal trays and R.A.P.P. collected and analyzed the X-ray crystallographic data. W.P. prepared the samples for the cryo-EM studies and collected negative stain images to screen for optimal sample conditions;

T.G. collected and processed all cryo-EM data, and reconstructed the cryo-EM maps under supervision of N.G.; R.A.P.P. built and interpreted the structural models. W.P. and N.B. performed and analyzed experiments with radioactively labeled KaiC. M.H. built the KaiC phylogeny. W.P., R.O., and D.K. wrote the paper; and all authors commented on the manuscript and contributed to data interpretation.

**Competing interests:** D.K. is co-founder of Relay Therapeutics and MOMA Therapeutics. The remaining authors declare no competing interests.



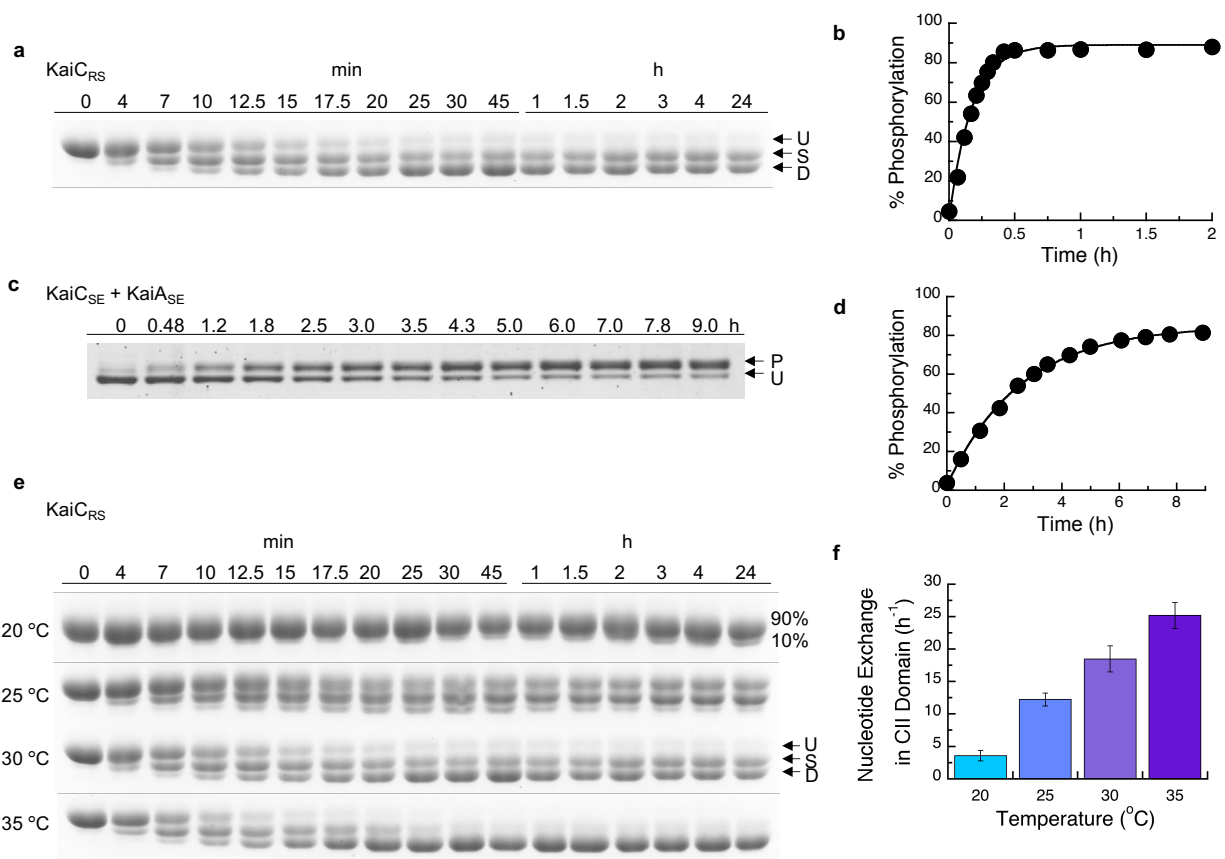

16

17 **Extended Data Fig. 2 | Auto-phosphorylation and**  
 18 **nucleotide exchange rates of KaiC.** (a) 10% SDS-PAGE ge  
 19 of 3.5  $\mu\text{M}$  KaiC<sub>RS</sub> in the presence of 4 mM ATP and using an  
 20 ATP-recycling system at 30 °C. U, S, and D represent  
 21 unphosphorylated, singly, and doubly phosphorylated KaiC<sub>RS</sub>  
 22 respectively. (b) Densitometric analysis of auto  
 23 phosphorylation (single + double phosphorylation) from pane  
 24 (a) over time yields a rate of  $6.5 \pm 1.0 \text{ h}^{-1}$ . (c) 6.5% SDS-PAGE  
 25 gel of 3.5  $\mu\text{M}$  KaiC<sub>SE</sub> in the presence of 1.2  $\mu\text{M}$  KaiA<sub>SE</sub> and  
 26 mM ATP at 30 °C. U and P represent unphosphorylated and  
 27 phosphorylated KaiC<sub>SE</sub>, respectively. (d) Densitometri  
 28 analysis of auto-phosphorylation of KaiC<sub>SE</sub> activated by  
 29 KaiA<sub>SE</sub> (panel (c)) shows a rate of  $0.40 \pm 0.02 \text{ h}^{-1}$  and i  
 30 substantially slower than for KaiC<sub>RS</sub>. The standard deviation  
 31 for parameters in (b) and (d) were obtained from data fitting. 46

47

(e) 10% SDS-PAGE gels for experiments with 3.5  $\mu\text{M}$  KaiC<sub>RS</sub> in the presence of 4 mM ATP and using an ATP-recycling system between 20 and 35 °C show that the level of phosphorylation increases with temperature. U, S, and D represent unphosphorylated, singly, and doubly phosphorylated KaiC<sub>RS</sub>, respectively. (f) Bar graphs indicating the nucleotide exchange rate in the CII domain of KaiC<sub>RS</sub> incubated with 50  $\mu\text{M}$  ATP in the presence of an ATP-recycling system, and then mixed with 250  $\mu\text{M}$  mant-ATP. An increase in fluorescence intensity at 440 nm was recorded and the single-exponential time traces were fitted to obtain the exchange rate constants:  $3.6 \pm 0.8 \text{ h}^{-1}$  (20 °C),  $12.2 \pm 1.0 \text{ h}^{-1}$  (25 °C),  $18.5 \pm 1.5 \text{ h}^{-1}$  (30 °C), and  $25.2 \pm 0.2 \text{ h}^{-1}$  (35 °C). Experiments were performed in triplicate with error bars representing SD.

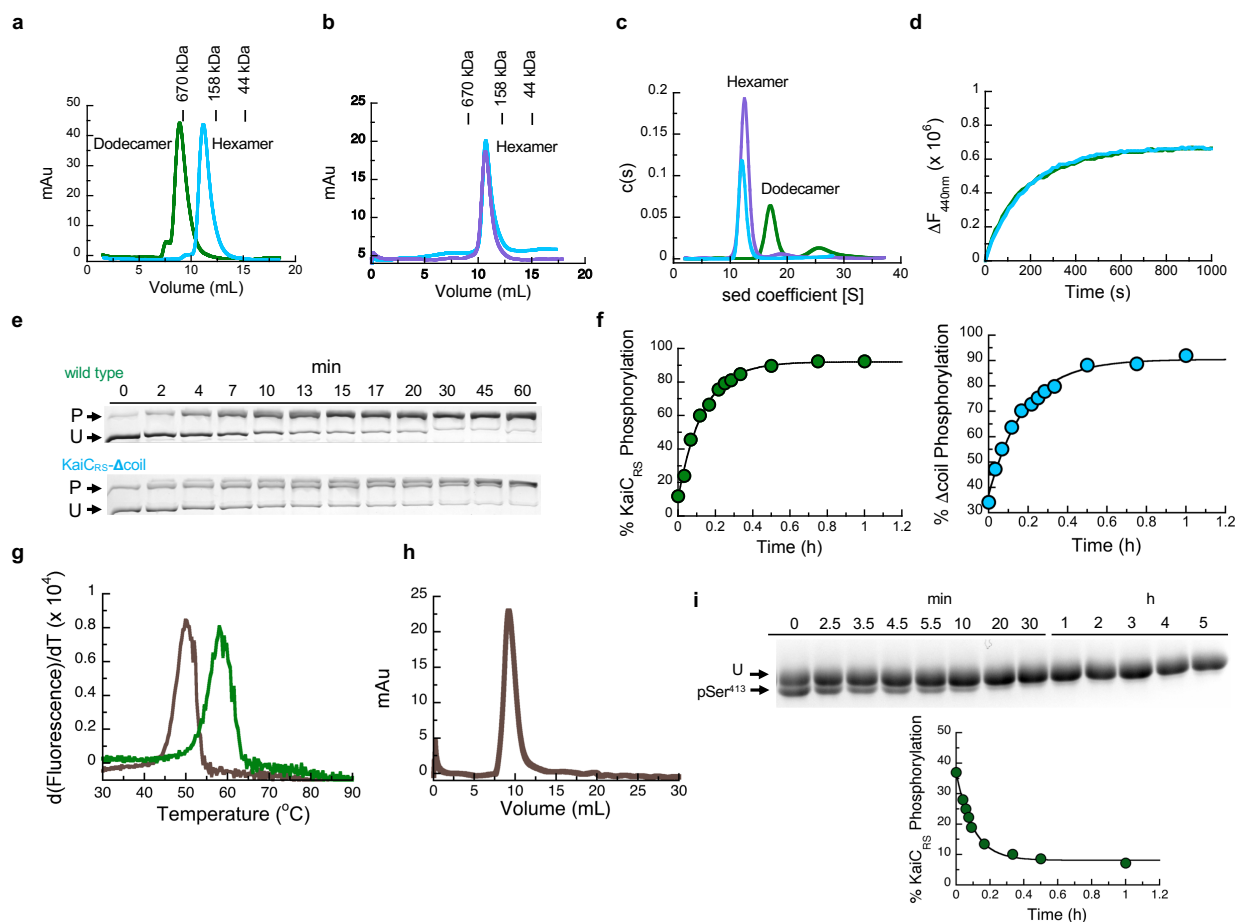

48

49 **Extended Data Fig. 3 | Oligomeric states of KaiCRS and**  
 50 **effect of coiled-coil domain on rates of nucleotide exchange**  
 51 **and auto-phosphorylation.** (a) Oligomerization analysis of  
 52 KaiCRS (dodecamer, green line) and truncated KaiCRS-Δcoil  
 53 (hexamer, cyan line) by analytical gel-filtration  
 54 chromatography. The protein size markers are indicated at the  
 55 top. (b) Comparison of the elution profiles of KaiCRS-Δcoil  
 56 (cyan line) and KaiCSE (purple line) from size-exclusion  
 57 chromatography shows a hexameric state for both KaiCRS  
 58 Δcoil and KaiCSE. (c) Oligomeric states of KaiCRS (dodecamer  
 59 green line), KaiCRS-Δcoil (hexamer, cyan line), and KaiCSE  
 60 (hexamer, purple line) were also measured by analytical  
 61 ultracentrifugation (sedimentation velocity at 30,000 rpm and  
 62 20 °C) and the results agree with the data shown in panels (d  
 63 and (e). The graph in panel (f) represents the sedimentation  
 64 coefficient distribution [c(s)]. (d) The change in fluorescence  
 65 at 440 nm ( $\Delta F_{440nm}$ ) represents the nucleotide exchange  
 66 between ATP and mant-ATP at 30 °C for KaiCRS (green trace,  
 67  $18.0 \pm 1.5 \text{ h}^{-1}$ ) and KaiCRS-Δcoil (cyan trace,  $19.1 \pm 0.8 \text{ h}^{-1}$ )  
 68 Representative traces are shown and the fitted parameters  
 69 (mean  $\pm$  S.D.) were obtained from three replicat  
 70 measurements. (e) Zn<sup>2+</sup> Phos-tag<sup>TM</sup> SDS-PAGE gel shows the  
 71 level of phosphorylation over time of KaiCRS (upper gel) and

KaiCRS-Δcoil (lower gel) at 35 °C. P and U represent  
 phosphorylated and unphosphorylated protein, respectively. (f)  
 Phosphorylation level over time of KaiCRS (green circles,  $7.4 \pm$   
 $0.3 \text{ h}^{-1}$ ) and KaiCRS-Δcoil (cyan circles,  $5.5 \pm 0.4 \text{ h}^{-1}$ ) analyzed  
 by densitometric analysis of Zn<sup>2+</sup> Phos-tag<sup>TM</sup> SDS-PAGE gel  
 in (b). (g) First derivative of thermal-stability curves measured  
 for unphosphorylated KaiCRS bound with ADP (brown line) and  
 phosphorylated KaiCRS bound with ATP (green line). The  
 extracted temperatures of denaturation are 50 °C  
 (unphosphorylated KaiCRS in the presence of 1 mM ADP) and  
 58 °C (phosphorylated KaiCRS in the presence of 1 mM ATP),  
 respectively. (h) Dodecameric state of unphosphorylated  
 KaiCRS (40 μM) bound with ADP measured by size-exclusion  
 chromatography. (i) SDS-PAGE gel shows dephosphorylation  
 of Ser<sup>413</sup> over time at 30 °C in the presence of 4 mM ADP (U  
 and pSer<sup>413</sup> represent unphosphorylated and Ser<sup>413</sup>-  
 phosphorylated KaiCRS, respectively) with the corresponding  
 kinetics shown in the lower panel (confirmed by MS/MS) with  
 a rate constant of  $11.5 \pm 0.8 \text{ h}^{-1}$ . This result suggests that the  
 coiled-coil domain promotes KaiCRS dephosphorylation. The  
 standard deviation for parameters in (f) and (i) were obtained  
 from data fitting.

94  
 95

96



97

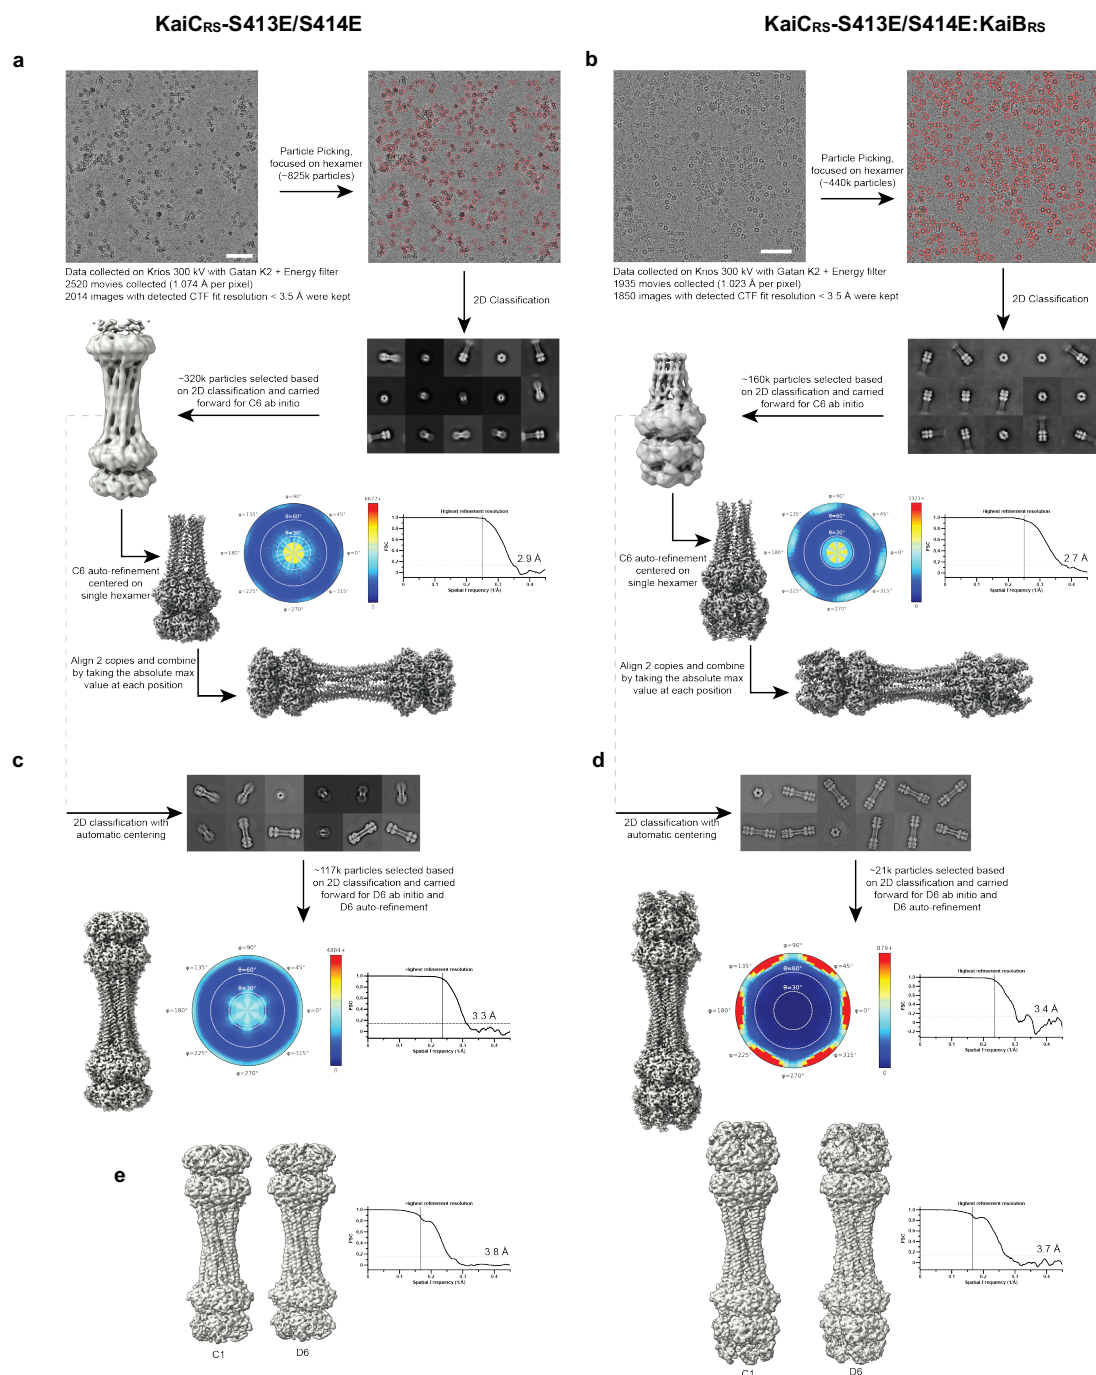

98

99 **Extended Data Fig. 4 | Graphical description of the cryo-EM processing workflow and validation of the final dodecamer structures.** The workflow (see description in Methods section) demonstrates a typical image (scale bar: 100 nm) and representative good class averages. The ab initio final reconstructions are shown. Shown alongside the final reconstruction is the angular plot demonstrating the distribution of particle views and the Fourier shell correlation curve used for the global resolution estimation (a) KaiCR<sub>S</sub>-S413E/S414E alone and (b) KaiCR<sub>S</sub>-S413E/S414E:KaiBR<sub>S</sub> complex. To validate the final combined dodecamer structures, the data were

reprocessed for the full dodecamer. The figure shows representative good class averages, the final reconstruction, angular distribution and Fourier shell correlation curve for the (c) KaiCR<sub>S</sub>-S413E/S414E alone and (d) KaiCR<sub>S</sub>-S413E/S414E:KaiBR<sub>S</sub> complex dodecamers. (e) Comparison of the C1 and D6 reconstructions of KaiCR<sub>S</sub>-S413E/S414E alone and KaiCR<sub>S</sub>-S413E/S414E:KaiBR<sub>S</sub>, and Fourier shell correlation curves for the C1 reconstructions. The C1/D6 comparisons do not reveal discernable differences, suggesting that these complexes have D6 symmetry.

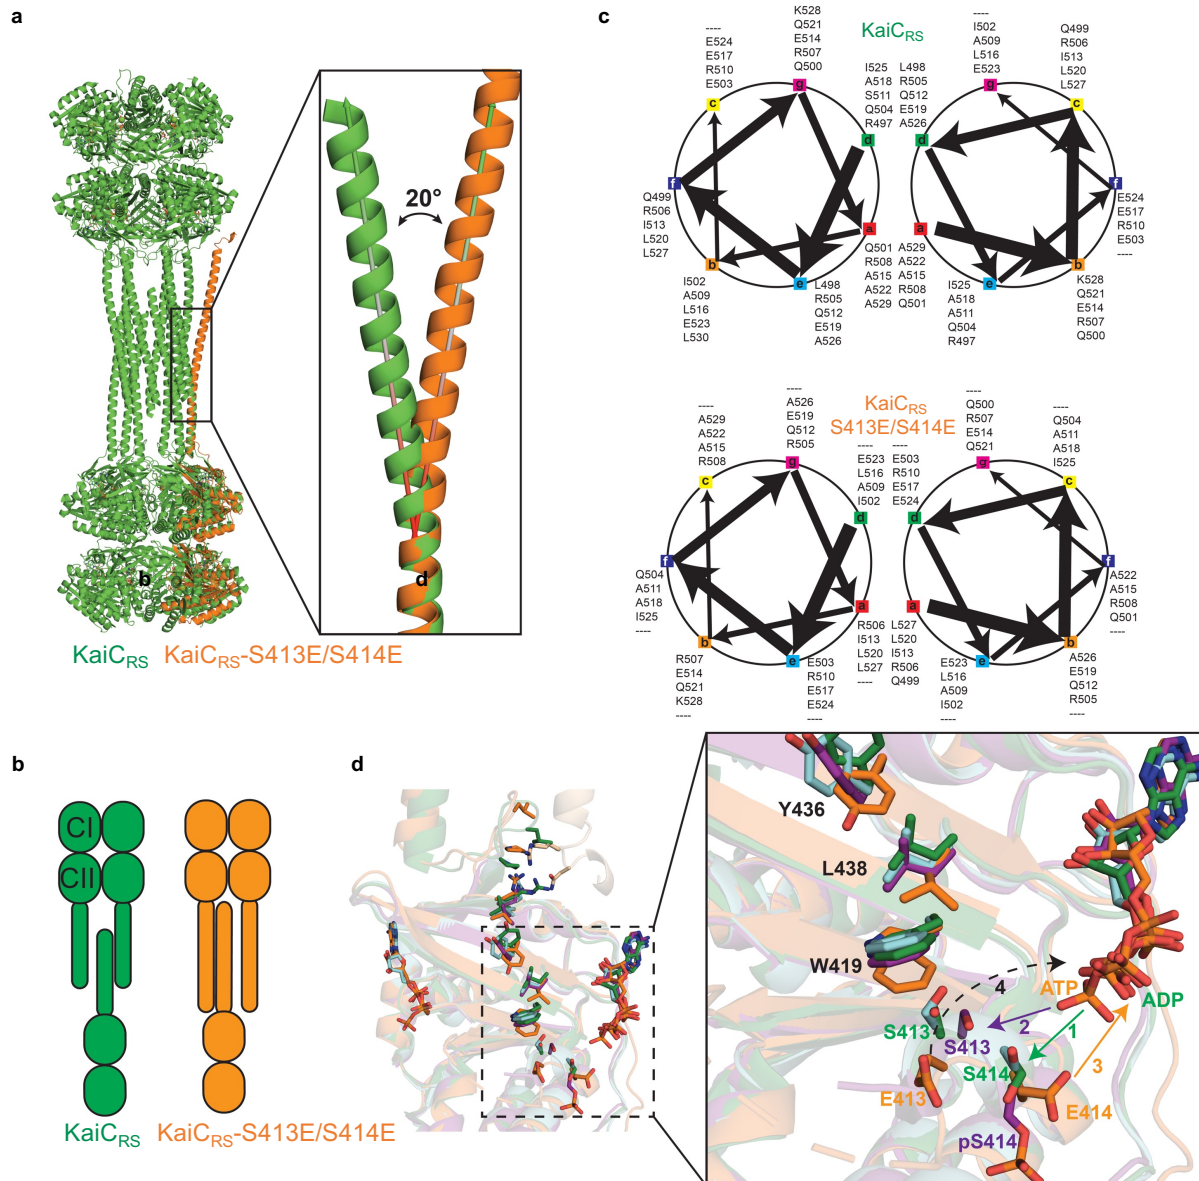

120

121 **Extended Data Fig. 5 | Correlation between the coiled-coil**  
 122 **register shift and phosphorylation, and model for**  
 123 **consecutive phosphorylation/dephosphorylation events**  
 124 **CII domain of KaiC<sub>RS</sub>. (a)** Structural comparison between  
 125 KaiC<sub>RS</sub> (green) and KaiC<sub>RS</sub>-S413E/S414E (orange, single  
 126 chain for clarity) reveals that the coiled-coil in  
 127 phosphomimetic structure points outwards, with an angle  
 128 about 20° relative to the KaiC<sub>RS</sub> coiled-coil. (b) The  
 129 conformational change in the coiled-coil domain affects the  
 130 dimer interface due to partner swaps with the opposite hexamer  
 131 (see also Fig. 2). From an “outside perspective”: the C-terminal  
 132 helix in KaiC<sub>RS</sub> interacts with the right chain from the opposite  
 133 hexamer, whereas in KaiC<sub>RS</sub>-S413E/S414E the interaction  
 134 with the chain on the left. (c) Coiled-coil diagrams describe the  
 135 heptad register shift that accompanies this structural  
 136 rearrangement. (d) Based on the overlay of our structures, we  
 137 propose the following model for the phosphorylation/  
 153

dephosphorylation events. First, the phosphorylation cycle starts with the transfer of the  $\gamma$ -phosphate of ATP to the hydroxyl group of Ser<sup>414</sup> (1; green arrow) in unphosphorylated KaiC<sub>RS</sub> (green) or KaiC<sub>RS</sub>- $\Delta$ coil (cyan). Secondly, pSer<sup>414</sup> of KaiC<sub>RS</sub>- $\Delta$ coil (purple, singly phosphorylated) moves away from the active site placing the hydroxyl group of Ser<sup>413</sup> closer to the  $\gamma$ -phosphate of ATP for the second phosphorylation (2; purple arrow). Thirdly, the doubly phosphomimetic state (KaiC<sub>RS</sub>-S413E/S414E, orange) reveals that the phosphoryl group of pSer<sup>414</sup> moves back towards the active site for dephosphorylation (3; orange arrow). Lastly, we hypothesize that the indole group of Trp<sup>419</sup> “pushes” pSer<sup>413</sup> into the active site for the second dephosphorylation event (dashed arrow), in agreement with the slower dephosphorylation rate observed in the KaiC<sub>RS</sub>- $\Delta$ coil construct (*cf.* Fig. 2d).

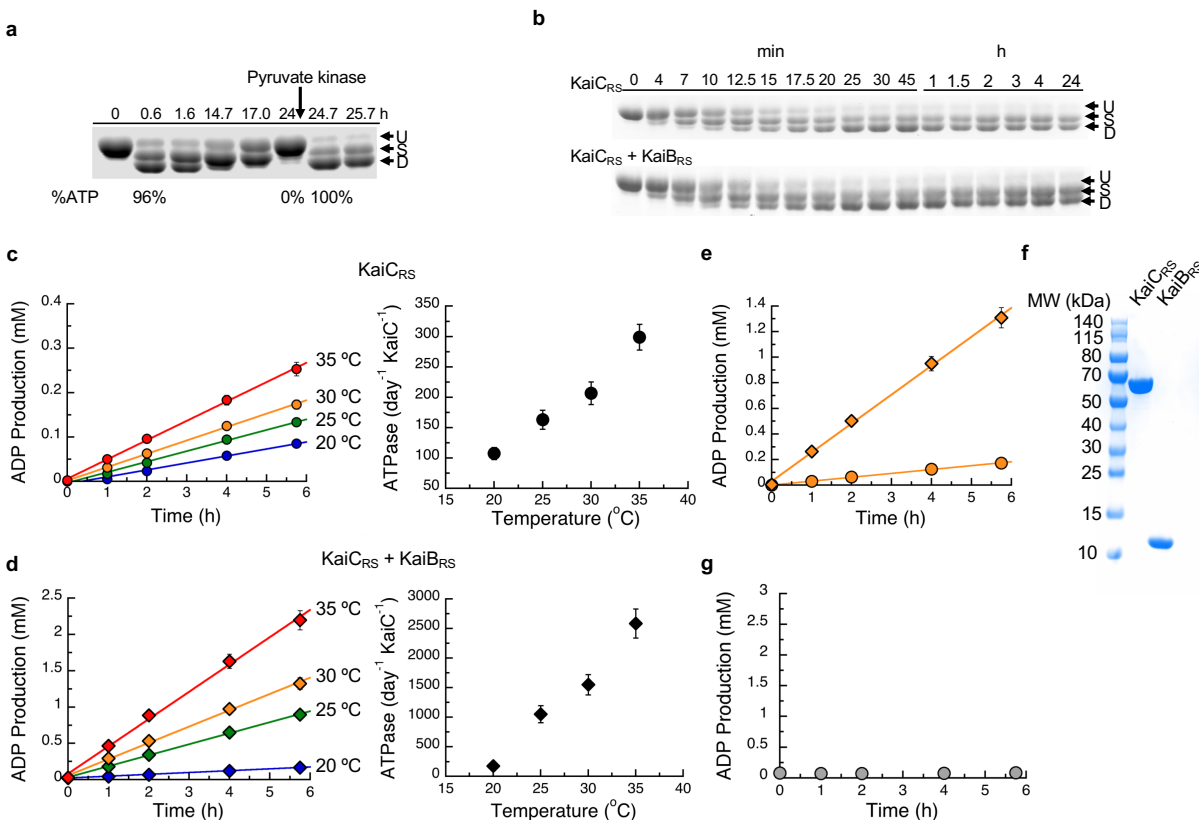

154

155 **Extended Data Fig. 6 | Effect of ATP-to-ADP ratio on**  
 156 **KaiCRS auto-dephosphorylation and the dependence**  
 157 **temperature and KaiBRS binding on the ATPase activity**  
 158 **KaiCRS.** (a) 10% SDS-PAGE gel of 3.5  $\mu\text{M}$  KaiCRS and  
 159  $\mu\text{M}$  KaiBRS in the presence of 4 mM ATP and 10 mM  
 160 phosphoenolpyruvate at 30 °C shows that the auto-  
 161 phosphorylation cycle restarts upon regeneration of ATP by the  
 162 addition of 2 U/mL pyruvate kinase at the 24-hour time mark.  
 163 (b) 10% SDS-PAGE gel of 3.5  $\mu\text{M}$  KaiCRS without (upper  
 164 panel) and with (lower panel) 3.5  $\mu\text{M}$  KaiBRS in the presence  
 165 of 4 mM ATP with an ATP-recycling system added from the  
 166 beginning showing that under these conditions KaiB does not  
 167 accelerate dephosphorylation. (c) Representative curves for  
 168 ADP production of KaiCRS (3.5  $\mu\text{M}$ ) alone and (d) in the  
 169 presence of KaiBRS (3.5  $\mu\text{M}$ ) in 4 mM ATP measured by  
 170 HPLC. The data were analyzed as described in the Methods  
 171 section and result in ATPase activities of  $108 \pm 10 \text{ day}^{-1} \text{ KaiC}^{-1}$   
 172  $^1$  (with KaiBRS =  $176 \pm 29 \text{ day}^{-1} \text{ KaiC}^{-1}$ ) at 20 °C,  $163 \pm 16 \text{ day}^{-1}$   
 173  $^1 \text{ KaiC}^{-1}$  (with KaiBRS =  $1052 \pm 143 \text{ day}^{-1} \text{ KaiC}^{-1}$ ) at 25 °C,  $208$   
 174  $\pm 19 \text{ day}^{-1} \text{ KaiC}^{-1}$  (with KaiBRS =  $1557 \pm 172 \text{ day}^{-1} \text{ KaiC}^{-1}$ ) at

175 30 °C, and  $300 \pm 21 \text{ day}^{-1} \text{ KaiC}^{-1}$  (with KaiBRS =  $2584 \pm 245$   
 176  $\text{day}^{-1} \text{ KaiC}^{-1}$ ) at 35 °C. The temperature coefficient,  $Q_{10}$ , was  
 177 calculated using the data obtained at 25 °C and 35 °C and yields  
 178 a value of  $\sim 1.9$ . The standard deviations of ATPase activity at  
 179 each temperature were obtained from three replicate  
 180 measurements. (e) The comparison of ADP production of  
 181 KaiCRS in the absence (orange circles) and presence (orange  
 182 diamonds) of KaiBRS at 30 °C indicate a 7.5-fold increase in  
 183 ATPase activity for the complex. The binding of KaiBRS  
 184 accelerates the ATPase activity of KaiCRS in both the CI and  
 185 CII domains (see also Extended Data Fig. 8b, c). (f) The SDS-  
 186 PAGE gel of KaiCRS (10  $\mu\text{g}$ ) and KaiBRS (10  $\mu\text{g}$ ) shows that  
 187 both proteins were purified to homogeneity and the measured  
 188 ATPase activity is, therefore, not due to impurities. (g) ADP  
 189 production of KaiBRS in 4 mM ATP at 30 °C shows, as  
 190 expected, no ATPase activity for KaiBRS alone and confirms  
 191 the increase in ATPase activity shown in panel (d) is due to  
 192 complex formation.

193

194

195

196

197



198

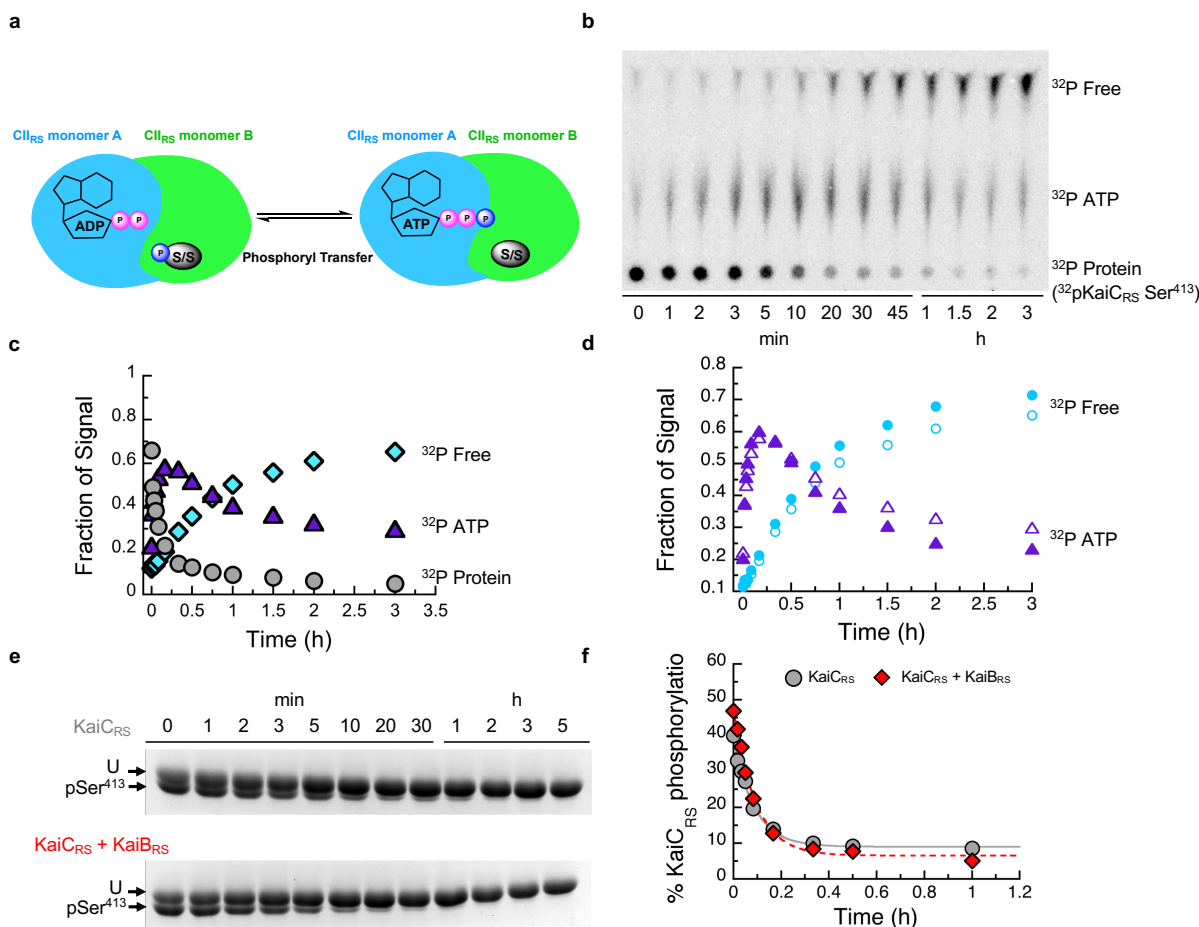

199

200 **Extended Data Fig. 7 | Dephosphorylation of KaiC<sub>RS</sub> occurs**  
 201 **via an ATP-synthase mechanism and the phosphoryl**  
 202 **transfer step is unaffected by the binding of KaiB<sub>RS</sub>.**  
 203 Possible mechanisms how KaiB<sub>RS</sub> could accelerate KaiC<sub>RS</sub>  
 204 dephosphorylation at nighttime. Binding of KaiB<sub>RS</sub> on the C<sub>155</sub>  
 205 domain directly accelerates the phosphoryl transfer from pSer<sup>413</sup>  
 206 to bound ADP to generate transiently bound ATP. The cartoon  
 207 represents the interface between two monomers in the C<sub>155</sub>  
 208 domain. **(b)** Autoradiograph of separation of <sup>32</sup>P-KaiC<sub>RS</sub> Ser<sup>413</sup>,  
 209 transiently formed <sup>32</sup>P-ATP, and free <sup>32</sup>Pi via thin-layer  
 210 chromatography (TLC) with 4 mM ADP at 30 °C, with the  
 211 corresponding kinetics shown in **(c)** where gray circle, purple  
 212 triangle, and cyan diamonds represent the relative  
 213 concentrations of phosphorylated <sup>32</sup>P-KaiC<sub>RS</sub>, <sup>32</sup>P-ATP, and  
 214 free <sup>32</sup>Pi, respectively. **(d)** Comparison of transient <sup>32</sup>P-ATP

215 formation and decay in the absence (open triangle) and  
 216 presence (solid triangle) of KaiB<sub>RS</sub> and free <sup>32</sup>P formation  
 217 in the absence (open circles) and presence of KaiB<sub>RS</sub> (solid  
 218 circles). Faster decay of transient <sup>32</sup>P-ATP together with higher  
 219 free <sup>32</sup>P production in the presence of KaiB<sub>RS</sub> indicated that  
 220 KaiB<sub>RS</sub> accelerates hydrolysis in KaiC<sub>RS</sub>. **(e)** SDS-PAGE gel  
 221 (10%) of dephosphorylation of phosphorylated 3.5 μM KaiC<sub>RS</sub>  
 222 at Ser<sup>413</sup> without (upper gel) and with (lower gel) 3.5 μM  
 223 KaiB<sub>RS</sub> in the presence of 4 mM ADP at 30 °C. **(f)**  
 224 Denitometric analysis of data in panel **(e)** shows the decay of  
 225 total KaiC<sub>RS</sub> phosphorylation in the absence (gray circles) and  
 226 presence (red diamonds) of KaiB<sub>RS</sub> and yields rates of 11.5 ±  
 227 0.8 h<sup>-1</sup> and 11.0 ± 0.8 h<sup>-1</sup>, respectively. This result indicates that  
 228 binding of KaiB<sub>RS</sub> does not accelerate the phosphoryl-transfer  
 229 step in KaiC<sub>RS</sub>.

230

231

232

233

234

235

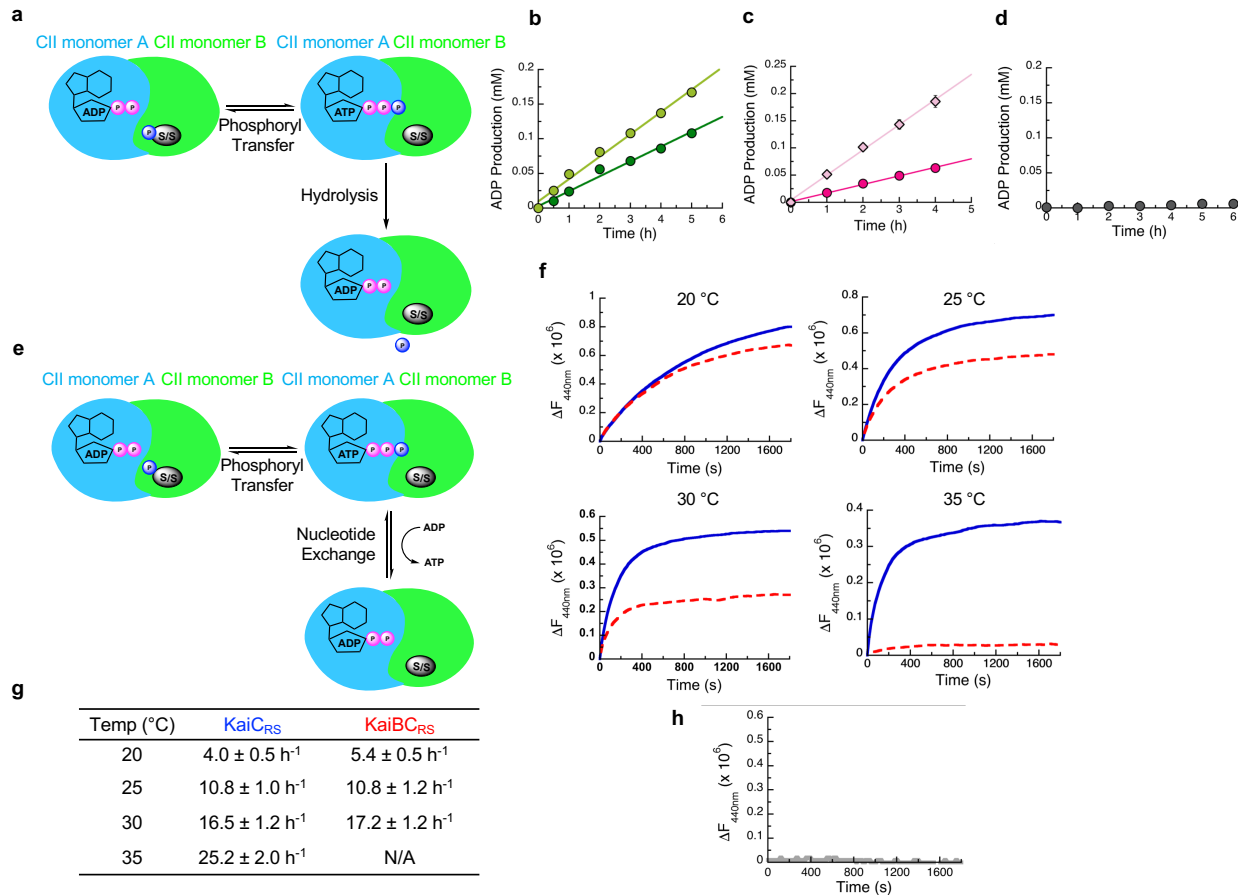

236

237 **Extended Data Fig. 8 | Effect of KaiB<sub>RS</sub> binding on ATPase**  
 238 **activity and nucleotide exchange in the CII domain**  
 239 **KaiC<sub>RS</sub>.** (a) Second possible mechanism to explain how  
 240 KaiB<sub>RS</sub> accelerates KaiC<sub>RS</sub> dephosphorylation at nighttime  
 241 binding of KaiB<sub>RS</sub> to the CI<sub>RS</sub> domain could increase the  
 242 hydrolysis rate in the CII<sub>RS</sub> domain and, thereby, prevent  
 243 phosphoryl transfer back from transiently formed or external  
 244 ATP back to serine residues. (b) ADP production from  
 245 phosphorylated KaiC<sub>RS</sub> with catalytic mutations in the  
 246 domain (KaiC<sub>RS</sub>-E62Q/E63Q, 3.5 μM) in the absence (dark  
 247 green circles) and presence (light green circles) of 3.5 μM  
 248 KaiB<sub>RS</sub> at 30 °C with 4 mM ATP was quantified using HPLC.  
 249 From these data an ATPase activity in the CII domain of 112 ±  
 250 8 day<sup>-1</sup> KaiC<sup>-1</sup> and 195 ± 16 day<sup>-1</sup> KaiC<sup>-1</sup> in the presence  
 251 KaiB<sub>RS</sub> was determined. (c) ADP production measured  
 252 HPLC as in panel (b) of KaiC<sub>RS</sub> but with catalytic mutations  
 253 the CII domain (KaiC<sub>RS</sub>-E302Q/E303Q, 3.5 μM) in the  
 254 absence (dark pink circles) and presence (light pink diamonds)  
 255 of 3.5 μM KaiB<sub>RS</sub>. The corresponding ATPase activities in the  
 256 CI domain are 110 ± 12 day<sup>-1</sup> KaiC<sup>-1</sup> in the absence and 320 ±  
 257 22 day<sup>-1</sup> KaiC<sup>-1</sup> in the presence of KaiB<sub>RS</sub>. (d) ADP production  
 258 of KaiC<sub>RS</sub>-E62Q/E63Q (construct of only CI domain with  
 259 catalytic mutations) in 4 mM ATP at 30 °C shows no ATPase  
 260 activity indicating that Glu<sup>62</sup> and Glu<sup>63</sup> are the only two  
 261 residues that

are responsible for ATPase activity in CI domain of KaiC<sub>RS</sub> and  
 confirms the ATPase activity shown in panel C is due to  
 ATPase activity in CII domain of KaiC<sub>RS</sub>. (e) Third possible  
 mechanism to explain how KaiB<sub>RS</sub> accelerates KaiC<sub>RS</sub>  
 dephosphorylation at nighttime: binding of KaiB<sub>RS</sub> to the CI<sub>RS</sub>  
 domain could promote faster nucleotide exchange in the CII<sub>RS</sub>  
 domain to displace transient ATP by ADP. (f) Time course of  
 fluorescence intensity at 440 nm due to binding of mant-ATP  
 to KaiC<sub>RS</sub>-S413E bound with ATP in the absence (solid blue  
 trace) and presence (red dotted trace) of KaiB<sub>RS</sub>. KaiC<sub>RS</sub>-  
 S413E (3.5 μM) was pre-incubated with 3.5 μM KaiB<sub>RS</sub> for 16  
 h at 20, 25, 30, and 35 °C in the presence of 50 μM ATP and  
 an ATP-recycling system and then mixed with 250 μM mant-  
 ATP. The observed exchange rates at each temperature are  
 listed in the table (g). (h) Nucleotide exchange of KaiC<sub>RS</sub>  
 (i.e., only CI<sub>RS</sub> domain) cannot be measured since there is no  
 tryptophan residue in close proximity of the nucleotide binding  
 site. In summary, KaiB<sub>RS</sub> accelerates KaiC<sub>RS</sub>  
 dephosphorylation by increasing the hydrolysis rate in the CI  
 and CII domains and does not affect the nucleotide exchange  
 rate. Representative traces are shown in (f) and (h) and the  
 fitted parameters (g; mean ± S.D) were obtained from three  
 replicate measurements.

285

286

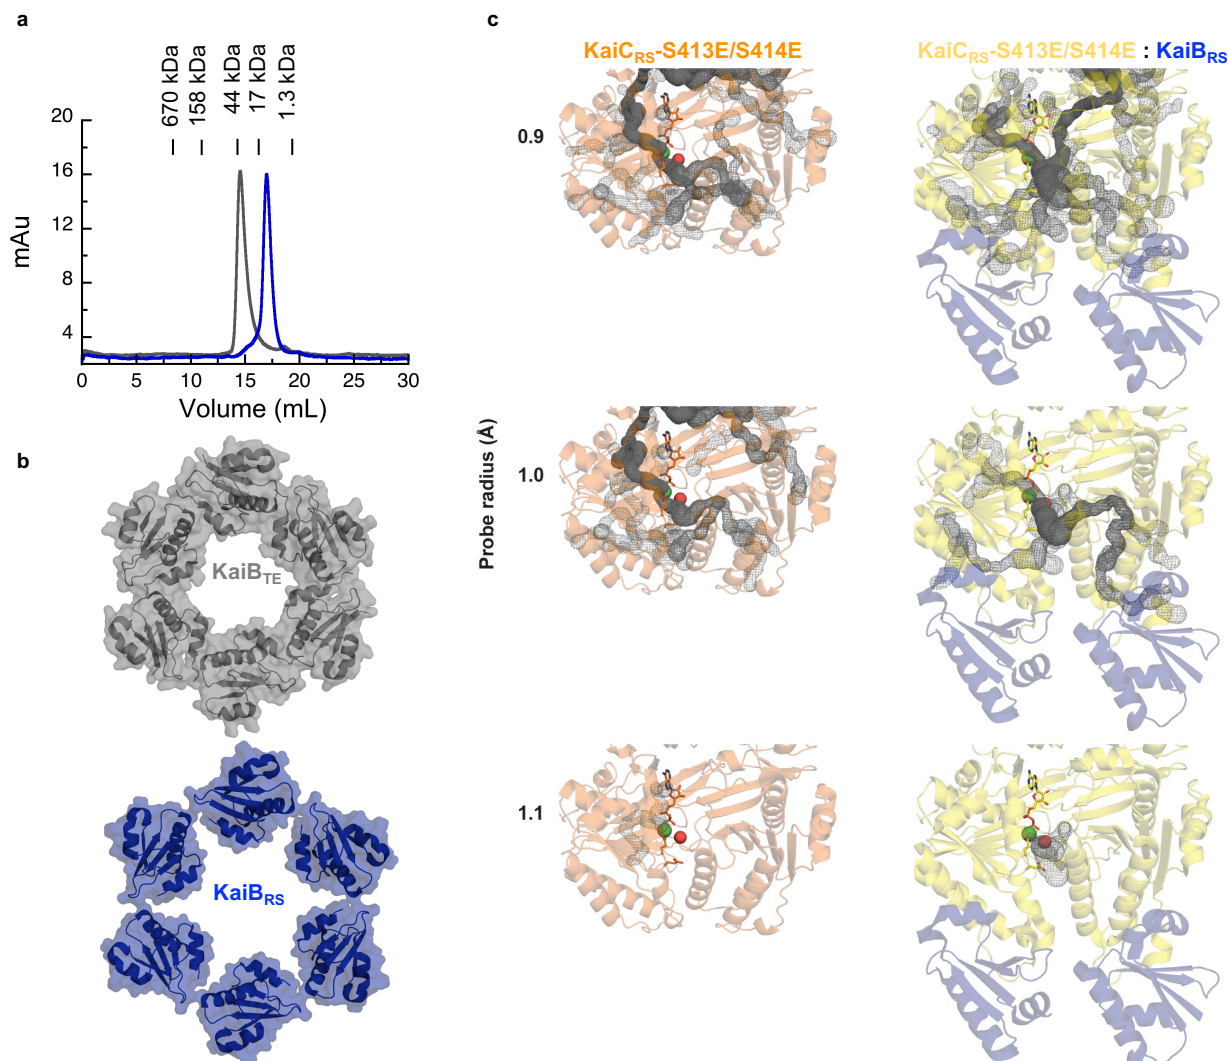

287

288 **Extended Data Fig. 9 | KaiB-KaiB interface in the KaiBC**  
 289 **complex affects the solvent accessibility into the active site**  
 290 **of KaiC<sub>RS</sub>-CI** (a) Size-exclusion chromatography of KaiB<sub>RS</sub>  
 291 (blue) shows that it is monomeric in solution in contrast  
 292 KaiB<sub>SE</sub> (gray), which elutes as a tetramer. Molecular-weight  
 293 standards are shown above the chromatogram. (b) Structural  
 294 comparison of KaiB<sub>TE</sub> (gray, PDB 5jwq<sup>26</sup>) and KaiB<sub>RS</sub> (blue)  
 295 when bound to their corresponding KaiC hexamers. The PISA  
 296 software package<sup>37</sup> determines that for the KaiBC<sub>TE</sub> complex  
 297 the interface between the KaiB<sub>TE</sub> monomers is 255 Å<sup>2</sup>  
 298 whereas the average interface between KaiB<sub>RS</sub> monomers  
 299 only 45 Å<sup>2</sup> in the KaiBC<sub>RS</sub> complex. (c) To understand how  
 300 KaiB<sub>RS</sub> binding to KaiC<sub>RS</sub>-CI domain increases the hydrolysis  
 301 rate, we investigated whether conformational changes  
 302 modulated substrate access to the active site. The CAVER

303 software<sup>39</sup> was used to calculate tunnels (gray mesh) leading  
 304 into the active site of the CI domain of KaiC<sub>RS</sub>-S413E/S414E  
 305 alone (orange) and the KaiC<sub>RS</sub>-S413E/S414E:KaiB<sub>RS</sub> complex  
 306 (yellow:blue) with varying probe radii. In both structures, the  
 307 active site was occupied by ADP:Mg<sup>2+</sup> (sticks and green  
 308 sphere, respectively). The crystal structure of bovine F1-  
 309 ATPase in complex with a transition-state analogue (PDB  
 310 1w0j, chain D)<sup>40</sup> was used as a reference to determine the  
 311 position of the catalytic water molecule in the active site  
 312 (shown as a red sphere). The calculated tunnels connect bulk  
 313 solvent to the catalytic water when KaiB<sub>RS</sub> is bound for probe  
 314 radii larger than the default value of 0.9 Å, but never in its  
 315 absence. These results suggest that KaiB<sub>RS</sub> facilitates the access  
 316 of water into the active site of KaiC<sub>RS</sub>-CI via long-range  
 317 conformational changes and thus enhances ATP hydrolysis.

318

319

320

321

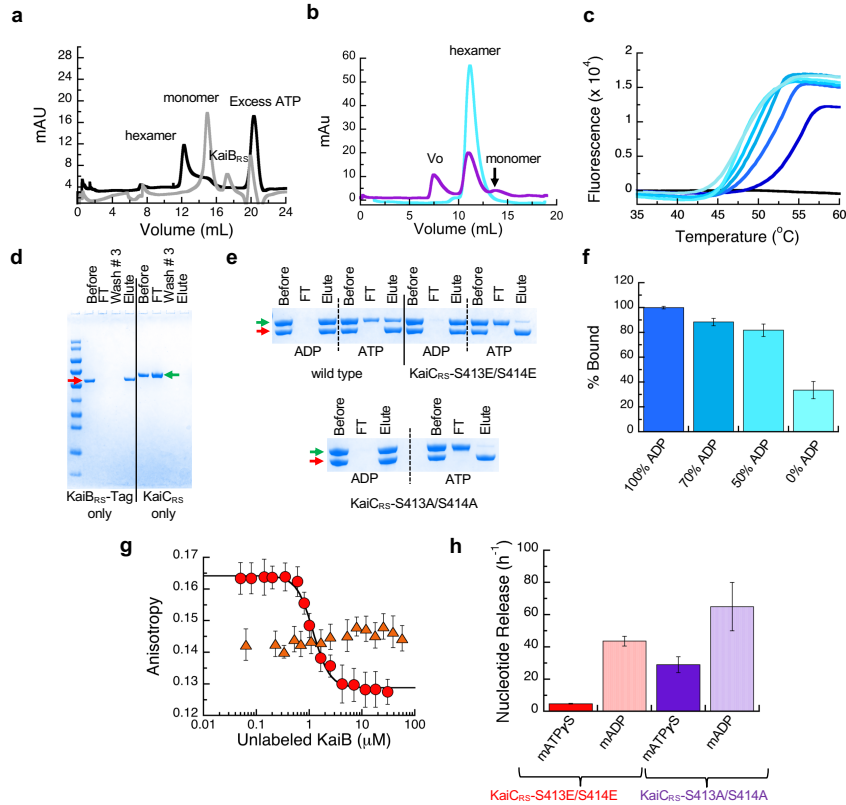

322

323 **Extended Data Fig. 10 | KaiB<sub>RS</sub> binds preferentially to the**  
 324 **post-hydrolysis state of KaiC<sub>RS</sub> and affects its stability.**  
 325 Size-exclusion chromatography of 50 μM KaiC<sub>RS</sub>-CI (CII  
 326 domain) in the absence (black line, hexamer) and presence  
 327 (gray line, monomer) of 50 μM KaiB<sub>RS</sub> in 1 mM ATP buffer.  
 328 **(b)** Size-exclusion chromatography of 50 μM KaiC<sub>RS</sub>-Δcoil  
 329 the presence of 50 μM KaiB<sub>RS</sub> (purple). The reference sample  
 330 (50 μM KaiC<sub>RS</sub>-Δcoil) is a hexamer in solution (cyan) and after  
 331 the addition of 50 μM KaiB<sub>RS</sub> the mixture was incubated at  
 332 °C for 3.5 h (purple) before running the samples again on  
 333 Superdex-200 10/300 GL column at 4 °C. These data show that  
 334 binding of KaiB<sub>RS</sub> results in (i) disassembly of the hexamer  
 335 KaiC<sub>RS</sub>-Δcoil structure into its monomers and (ii) aggregation  
 336 as detected by the elution in the void volume of the column  
 337 (v<sub>0</sub>). **(c)** Thermal denaturation profiles for KaiC<sub>RS</sub>-  
 338 S413E/S414E in the presence of 1 mM ADP are shown from  
 339 dark to light blue for increasing concentrations of KaiB<sub>RS</sub>  
 340 (between 0 – 4 μM). The black line represents KaiB<sub>RS</sub> alone  
 341 (15 μM), which shows no fluorescence signal as it does not  
 342 bind to SYPRO Orange due to a lack of a hydrophobic core.  
 343 The T<sub>m</sub> decreases upon the addition of KaiB<sub>RS</sub>, indicating that  
 344 binding of KaiB<sub>RS</sub> destabilizes the KaiC<sub>RS</sub> dodecamer. Likely  
 345 due to loosening up of interface and the KaiC<sub>RS</sub> structure  
 346 thereby allowing for the formation of a tunnel that connects  
 347 bulk solvent to the position of the hydrolytic water in the active  
 348 site (see Extended Data Fig. 9). **(d)** SDS-PAGE analysis  
 349 showing the control experiment for pull-down assay. The first  
 350 four lanes after the molecular weight marker are KaiB<sub>RS</sub>-Tag  
 351 samples (red arrow) and show that KaiB<sub>RS</sub>-Tag binds tightly to  
 352 the column. The last four lanes are control pull-down assay  
 353 experiments for KaiC<sub>RS</sub> (green arrow) and show that KaiC<sub>RS</sub>

354 alone is unable to bind to the column. The lanes represent the  
 355 initial sample used in pull-down assay (Before), flow-through  
 356 after loading sample onto the column (FT), flow-through after  
 357 washing the column three times with the binding buffer (Wash  
 358 #3), and sample after elution with imidazole (Elute). **(e)** SDS-  
 359 PAGE analysis of pull-down assay to measure the complex  
 360 formation between KaiB<sub>RS</sub>-Tag and wild-type KaiC<sub>RS</sub>, KaiC<sub>RS</sub>-  
 361 S413E/S414E, or KaiC<sub>RS</sub>-S413A/S414A in the presence of 4  
 362 mM ADP or ATP (with an ATP-recycling system). **(f)**  
 363 Percentage of wild-type KaiC<sub>RS</sub> bound to KaiB<sub>RS</sub>-Tag protein  
 364 for different ATP-to-ADP ratios (4 mM total nucleotide  
 365 concentration) at 25 °C as measured from pull-down assays. **(g)**  
 366 Fluorescence anisotropy at 30 °C of unlabeled KaiB<sub>RS</sub>  
 367 competitively replacing the fluorophore-labeled KaiB<sub>RS</sub>  
 368 (KaiB<sub>RS</sub>-6IAF) from KaiC<sub>RS</sub>-S413E/S414E in the presence of  
 369 4 mM ADP (red circles, K<sub>D</sub> value of 0.79 ± 0.06 μM) and 4  
 370 mM ATP with an ATP-recycling system (orange triangles). In  
 371 the latter experiment no change in anisotropy is observed,  
 372 indicating that only a small fraction of KaiB<sub>RS</sub>-6IAF is bound  
 373 under these conditions. The average anisotropy and standard  
 374 error were calculated from ten replicate measurements. **(h)** The  
 375 mant-ATPγS or mant-ADP release is shown as bar graphs with  
 376 observed rates of 4.8 ± 0.2 h<sup>-1</sup> and 43.6 ± 3.0 h<sup>-1</sup> for mant-  
 377 ATPγS and mant-ADP releasing from KaiC<sub>RS</sub>-S413E/S414E,  
 378 respectively, and 21.0 ± 3.0 h<sup>-1</sup> and 65 ± 15 h<sup>-1</sup> for mant-  
 379 ATPγS and mant-ADP releasing from KaiC<sub>RS</sub>-S413A/S414A,  
 380 respectively. The result shows that CII domain of KaiC<sub>RS</sub>  
 381 prefers binding of ATP over ADP. Experiments in panels f and  
 382 h were performed in triplicate with error bars representing SD.

383  
384  
385

Extended Data Table 1 | X-ray crystallography data collection and refinement statistics

|                                                      | KaiCRS<br>PDB: 8dba<br>(oligomeric state:<br>dodecamer) | KaiCRS-Δcoil<br>PDB: 8db3<br>(oligomeric state:<br>hexamer) |
|------------------------------------------------------|---------------------------------------------------------|-------------------------------------------------------------|
| <b>Data collection</b>                               |                                                         |                                                             |
| Space group                                          | P1                                                      | C222 <sub>1</sub>                                           |
| Cell dimensions                                      |                                                         |                                                             |
| <i>a</i> , <i>b</i> , <i>c</i> (Å)                   | 105.11, 136.09, 146.2                                   | 94.06, 197.28, 150.19                                       |
| $\alpha$ , $\beta$ , $\gamma$ (°)                    | 93.13, 94.43, 108.09                                    | 90, 90, 90,                                                 |
| Resolution (Å)                                       | 47.65 - 3.5 (3.625 - 3.5)*                              | 53.89 - 2.9 (3.004 - 2.9)*                                  |
| <i>R</i> <sub>sym</sub> or <i>R</i> <sub>merge</sub> | 0.2213 (1.372)                                          | 0.4267 (2.994)                                              |
| <i>I</i> / $\sigma$ <i>I</i>                         | 2.57 (0.73)                                             | 5.54 (1.15)                                                 |
| Completeness (%)                                     | 97.62 (94.08)                                           | 99.89 (99.97)                                               |
| Redundancy                                           | 1.9 (2.0)                                               | 7.2 (7.3)                                                   |
| <b>Refinement</b>                                    |                                                         |                                                             |
| Resolution (Å)                                       | 3.5                                                     | 2.9                                                         |
| No. reflections                                      | 94151 (9047)                                            | 31344 (3102)                                                |
| <i>R</i> <sub>work</sub> / <i>R</i> <sub>free</sub>  | 0.2323/ 0.2775                                          | 0.2308/0.2892                                               |
| No. atoms                                            | 47510                                                   | 10293                                                       |
| Protein                                              | 46772                                                   | 10131                                                       |
| Ligand/ion                                           | 948                                                     | 231                                                         |
| Water                                                | 67                                                      | 0                                                           |
| <i>B</i> -factors                                    |                                                         |                                                             |
| Protein                                              | 102.48                                                  | 56.06                                                       |
| Ligand/ion                                           | 89.08                                                   | 44.62                                                       |
| Water                                                | 72.52                                                   | -                                                           |
| R.m.s. deviations                                    |                                                         |                                                             |
| Bond lengths (Å)                                     | 0.002                                                   | 0.004                                                       |
| Bond angles (°)                                      | 0.62                                                    | 0.73                                                        |

\*Values in parentheses are for highest-resolution shell.  
A single crystal was used for each structure.

386  
387  
388

389  
390

Extended Data Table 2 | Cryo-EM data collection, refinement, and validation statistics

|                                                  | KaiC <sub>RS</sub> -S413E/S414E<br>(EMDB-xxxx)<br>(PDB xxxx)<br>(oligomeric state:<br>dodecamer) | KaiC <sub>RS</sub> -S413E/S414E:KaiB <sub>RS</sub><br>(EMDB-xxxx)<br>(PDB xxxx)<br>(oligomeric state:<br>dodecamer) |
|--------------------------------------------------|--------------------------------------------------------------------------------------------------|---------------------------------------------------------------------------------------------------------------------|
| <b>Data collection and processing</b>            |                                                                                                  |                                                                                                                     |
| Magnification                                    |                                                                                                  |                                                                                                                     |
| Voltage (kV)                                     | 300                                                                                              | 300                                                                                                                 |
| Electron exposure (e-/Å <sup>2</sup> )           | 91.7                                                                                             | 94.5                                                                                                                |
| Defocus range (µm)                               |                                                                                                  |                                                                                                                     |
| Pixel size (Å)                                   | 1.074                                                                                            | 1.023                                                                                                               |
| Symmetry imposed                                 | C6                                                                                               | C6                                                                                                                  |
| Initial particle images (no.)                    | 82,500                                                                                           | 440,00                                                                                                              |
| Final particle images (no.)                      | 32,000                                                                                           | 190,000                                                                                                             |
| Map resolution (Å)                               | 2.9                                                                                              | 2.6                                                                                                                 |
| FSC threshold                                    | 0.143                                                                                            | 0.143                                                                                                               |
| Map resolution range (Å)                         |                                                                                                  |                                                                                                                     |
| <b>Refinement</b>                                |                                                                                                  |                                                                                                                     |
| Initial model used (PDB code)                    | KaiC <sub>RS</sub> (this study)                                                                  | KaiC <sub>RS</sub> (this study), 5jwo <sup>26</sup>                                                                 |
| Model resolution (Å)                             | 3.0                                                                                              | 3.1                                                                                                                 |
| FSC threshold                                    | 0.143                                                                                            | 0.143                                                                                                               |
| Model resolution range (Å)                       |                                                                                                  |                                                                                                                     |
| Map sharpening <i>B</i> factor (Å <sup>2</sup> ) |                                                                                                  |                                                                                                                     |
| Model composition                                |                                                                                                  |                                                                                                                     |
| Non-hydrogen atoms                               | 51,828                                                                                           | 59,520                                                                                                              |
| Protein residues                                 | 6,576                                                                                            | 7,644                                                                                                               |
| Ligands                                          | 48                                                                                               | 48                                                                                                                  |
| <i>B</i> factors (Å <sup>2</sup> )               |                                                                                                  |                                                                                                                     |
| Protein                                          | 51.86                                                                                            | 63.16                                                                                                               |
| Ligand                                           | 42.31                                                                                            | 76.06                                                                                                               |
| R.m.s. deviations                                |                                                                                                  |                                                                                                                     |
| Bond lengths (Å)                                 | 0.003                                                                                            | 0.009                                                                                                               |
| Bond angles (°)                                  | 0.677                                                                                            | 0.931                                                                                                               |
| Validation                                       |                                                                                                  |                                                                                                                     |
| MolProbity score                                 | 2.22                                                                                             | 2.84                                                                                                                |
| Clashscore                                       | 17.99                                                                                            | 25.00                                                                                                               |
| Poor rotamers (%)                                | 2.30                                                                                             | 3.61                                                                                                                |
| Ramachandran plot                                |                                                                                                  |                                                                                                                     |
| Favored (%)                                      | 96.88                                                                                            | 90.81                                                                                                               |
| Allowed (%)                                      | 2.94                                                                                             | 9.19                                                                                                                |
| Disallowed (%)                                   | 0.18                                                                                             | 0.00                                                                                                                |

391



392 Extended Data Table 3 | Codon-optimized DNA sequence for KaiC<sub>RS</sub> and KaiB<sub>RS</sub> constructs

393

| Protein            | Plasmid | DNA Sequence                                                                                                                                                                                                                                                                                                                                                                                                                                                                                                                                                                                                                                                                                                                                                                                                                                                                                                                                                                                                                                                                                                                                                                                                                                                                                                                                                                                                                                                                                                                                                                                                                                                                                                                                                                                                                                                                                                            |
|--------------------|---------|-------------------------------------------------------------------------------------------------------------------------------------------------------------------------------------------------------------------------------------------------------------------------------------------------------------------------------------------------------------------------------------------------------------------------------------------------------------------------------------------------------------------------------------------------------------------------------------------------------------------------------------------------------------------------------------------------------------------------------------------------------------------------------------------------------------------------------------------------------------------------------------------------------------------------------------------------------------------------------------------------------------------------------------------------------------------------------------------------------------------------------------------------------------------------------------------------------------------------------------------------------------------------------------------------------------------------------------------------------------------------------------------------------------------------------------------------------------------------------------------------------------------------------------------------------------------------------------------------------------------------------------------------------------------------------------------------------------------------------------------------------------------------------------------------------------------------------------------------------------------------------------------------------------------------|
| KaiC <sub>RS</sub> | pETM-41 | <p>ATGGGCATCGGCAAGAGCCCGACCGGCATTCAGGGTTTCGACGAACTGACCCCTGGGT<br/> GGCTGCGGACCGGCCGTCGAGCCTGGTTTGCGGTAGCGCGGGTTGCGGTAACAAAC<br/> CTGTTCCGCGAGCACCTTCTGATTAACGGCGTGCCTGATCACGGCGAACCGGGTGGT<br/> TTCGTGACCTTTGAGGAACGTCCGGAGGACATCGTTAACACCGTGGCGAGCCCTGGGT<br/> TTCGAACTGGATAAGCTGATCGAGGAAGAGAAAATCGCGATTGAGCACATTGCGGTT<br/> GACCCGAGCGAAGTGGCGGAGATCGGGGACTACGATCTGGAGGGTCTGTTCTGCGT<br/> CTGGAACCTGGCGATTGACACCGTTGGTGCAGAGCGTGGTTCTGGATAACCATCGAA<br/> AGCCTGTTTCAGCGCGTTTAGCAACCCGCGGATCCTGCGTGCAGAGATTCTGCTCTG<br/> TTCGACTGGCTGAAAGAACGTGGCCTGACCACCGTATTACCGCGGAGCGTGGCGAT<br/> GGTGCCTGACCCGTCAAGGTCTGGAAGAGTATGTAGCGACTGCGTATCCTGCTG<br/> GATCACCGTGTGAGAACCAGATCAGCACCCGTCGCTGCGTATTGTGAAGTACCCT<br/> GGCACCGCGCACGGCACCAACGAATATCCGTTCTGATCGACACCGATGGCTTAGC<br/> GTTCTGCCGGTGGCGCGCTGGGTCTGCTGCACCAAGTTCACGAAGAGCGTATTGCG<br/> AGCGGTGTGCCGACCTGGATGCGATGATGGCGGGTGGCGGGTTCTTTCTGTCGACG<br/> AGCATTTCTGGTTAGCGGTGTGGCGGGTGCGGGTAAAAGCAGCTGGCGGCGCACTTT<br/> GCTGCGGCGCGCTGCGCGCTGGCGAGCGTGCATGTACTTCAGCTTTGAAGAGGCG<br/> GCGGATCAGGCGGTTTCGTAACATGCGTAGCCTGGGCTGGACCTGGGTCTGGCGGT<br/> GATGCGGGTCTGCTGCGTTTCATGGCGACCCGTCGACCTTTTATAGCTGGAAATG<br/> CACCTGGCGGTTATCTGCGTGAGGTGATGCGTTTCGAACCGAGCGTGGTTGTGCTG<br/> GACCCGATCAGCGGTTTACCGAGAGCGGTGATCGTCTGGAAGTCAAAGCATGCTG<br/> CTGCGTATTGTGGACTTCTGAAGAACCGTGGCATCACCGGTATTTTACCACCTG<br/> GCGCACAGCAAACGAGGCGACACCGATGCGGGCCTGAGCAGCCTGATGGATGGT<br/> TGGGTTCTGATGCTGAACCGTGAAGTGAACGGCGAGTTCAACCGTGAACCTGACCTG<br/> CTGAAGGCGCGTGGTATGGCGCACAGCAACCAAGTTCGTGAGTTTCTGATGAGCGAT<br/> CGTGGTATTAGCTGCTGCCGCGCACCTGGGTGAAGCGGTGCGCTGACCGGCACC<br/> GCGCGTAAAGCGGAAGAGGCGCGTCTGCGTCTGCGGAAATCGAGCGTCAGACCGAG<br/> CTGGGTCGCTCGACGCAACAGATTGAACAACGTCGTCGCTGCGCGCTGCGCAGATT<br/> GAGGCGCTGGAAGCGGAGCTGCAAGCGGAAGAGATCGCGCTGAAGGCGCTGGTTGAG<br/> AGCGAGAGCGCGATGAACGTCACGCTGCGCGGATGCGGATACCCTGGCGCGTAGC<br/> CGTGGCAACGAACGTTTCGCGGACCTGCTGATGAACAAGGTGAG</p> |
| KaiB <sub>RS</sub> | pETM-41 | <p>ATGGGTCGTCGTCGTTGCTGTATGTGGCGGGTCAAACCCGAAAAGCTGGCGGCG<br/> ATTAGCAACCTGCGTCGTATCTGCGAGGAAAACCTGCCGGCCAGTACGAGGTGGAA<br/> GTTATCGACCTGAAGCAAACCCGCGCTGCGGAAAAGAGCACAGCATCGTGGCGATT<br/> CCGACCCCTGGTGCCTGAACCTGCCGTTCCGATCCGTAAGATTATTGGTGACCTGAGC<br/> GATAAAGAACAAGTGTGTTGTAACCTGAAAATGGACATGGAG</p>                                                                                                                                                                                                                                                                                                                                                                                                                                                                                                                                                                                                                                                                                                                                                                                                                                                                                                                                                                                                                                                                                                                                                                                                                                                                                                                                                                                                                                                                                                                                                                                                               |
| Protein Sequence   |         |                                                                                                                                                                                                                                                                                                                                                                                                                                                                                                                                                                                                                                                                                                                                                                                                                                                                                                                                                                                                                                                                                                                                                                                                                                                                                                                                                                                                                                                                                                                                                                                                                                                                                                                                                                                                                                                                                                                         |
| KaiC <sub>RS</sub> | pETM-41 | <p>*GAMGIGKSPTGIQGFDELTLGGLPTGRPSLVCGSAGCGKTLFASTFLINGVRDHGEP<br/> GVFVTFEERPEDI VNNVASLGFELDKLIEEEKIAIEHIAVDPSEVAEIGDYDLEGLF<br/> LRLELAIDTVGAKRVVLDTIESLFSAFSNPAILRAEIRRLFDWLKERGLTTVITAER<br/> GDGALTRQGLEEVVSDCVILLDHRVENQISTRRLRIVKYRGTAGHTNEYPFLLDIDTG<br/> FSVLPVVSALGLLHQVHEERIASGVPDL DAMMAGGGFFRGS SILVSGVAGAGKSSLA<br/> HFAAAACARGERAMYFSFEAAADQAVRNMRSLGLDLGRWRDAGLLRFMATRPTFYSL<br/> EMHLAVILREVMRFEPSVVVLDPI SAFTESGDRLEVQSMLLRIVDFLKNRGITGIFT<br/> HLAHSQNEATTDAGLSSLMGWLMLNREVNGEFNRELYLLKARGMAHNSQVREFLM<br/> SDRGISLPPHLEGEGALGTARKAEEARLRRAEIERQTELGRLOQQIEQRRRRARA<br/> QIEALEAELQAEELALKALVESESAHERQLADADTLARSRGNERFADLLMNKGE</p>                                                                                                                                                                                                                                                                                                                                                                                                                                                                                                                                                                                                                                                                                                                                                                                                                                                                                                                                                                                                                                                                                                                                                                                                                                                                  |
| KaiB <sub>RS</sub> | pETM-41 | <p>*GAMGRRLVLYVAGQTPKSLAAISNLRRICEENLPGQYEVEVIDLKQNPRLAKEHSIV<br/> AIPTLVRELPVPIRKIIIGDLSDKQVVLNLMKMDME</p>                                                                                                                                                                                                                                                                                                                                                                                                                                                                                                                                                                                                                                                                                                                                                                                                                                                                                                                                                                                                                                                                                                                                                                                                                                                                                                                                                                                                                                                                                                                                                                                                                                                                                                                                                                                                             |

394 \*GA are residues that are part of the after TEV protease recognition site and remain after cleavage. Residue numbering of both KaiC<sub>RS</sub>  
395 and KaiB<sub>RS</sub> start counting after residues GA.  
396

397 Extended Data Table 4 | Primers for site-directed mutagenesis and sequencing of KaiC<sub>RS</sub>

398

| Mutation                                                                 |                                                                      | Primer  |
|--------------------------------------------------------------------------|----------------------------------------------------------------------|---------|
| KaiC <sub>RS</sub> S413E                                                 | 5' GCGACCACCGATGCGGGCCTGGAAAGCCTGATGGATGGTTGGGTTC 3'                 | Forward |
|                                                                          | 5' GAACCCAACCATCCATCAGGCTTTCAGGCCCGCATCGGTGGTCGC 3'                  | Reverse |
| KaiC <sub>RS</sub> S413E/S414E                                           | 5' GCGACCACCGATGCGGGCCTGGAAAGACTGATGGATGGTTGGGTTC 3'                 | Forward |
|                                                                          | 5' GAACCCAACCATCCATCAGTTCCTCCAGGCCCGCATCGGTGGTCGC 3'                 | Reverse |
| KaiC <sub>RS</sub> S413A/S414A                                           | 5' GAGGCGACCACCGATGCGGGCCTGGCGGCGCTGATGGATGGTTGGTTCTGATG 3'          | Forward |
|                                                                          | 5' CATCAGAACCCAACCATCCATCAGCGCCGCCAGGCCCGCATCGGTGGTCGCCTC 3'         | Reverse |
| KaiC <sub>RS</sub> E62Q/E63Q                                             | 5' CACGGCGAACC GG GTGTTTTCGTGACCTTTCAGCAACGTCCGGAGGACATCGTTAACAAC 3' | Forward |
|                                                                          | 5' GTTGTTAACGATGTCTCCGGACGTTGCTGAAAGGTCACGAAAACACCCGGTTCGCCGTG 3'    | Reverse |
| KaiC <sub>RS</sub> E302Q/E303Q                                           | 5' GTGCGATGTA CTT CAGCTTTC AACAGGCGCGGATCAGGC 3'                     | Forward |
|                                                                          | 5' GCCTGATCCGCCGCTGTTGAAAGCTGAAGTACATCGCAC 3'                        | Reverse |
| KaiC <sub>RS</sub> -Δcoil<br>(residues 1–489)                            | 5' GCGGAAGAGGCGGCTCTGCGTCTGCGTAAATCGAGCGTCAGACCGAGCTGGGTGC 3'        | Forward |
|                                                                          | 5' CGACCCAGCTCGGTCTGACGCTCGATTTACGCACGACGACGCGCCTCTTCCGC 3'          | Reverse |
| KaiC <sub>IRS</sub><br>(residues 1–230)                                  | 5' GACACCGATGGCTTTAGCGTTCTGTAGGTGAGCGGCTGGGTCTGCTGCACCAA 3'          | Forward |
|                                                                          | 5' TTGGTGCAGCAGACCCAGCGGCTCACCTACAGAACGCTAAAGCCATCGGTGTC 3'          | Reverse |
| KaiC <sub>IRS</sub> E62Q/E63Q                                            | 5' CACGGCGAACC GG GTGTTTTCGTGACCTTTCAGCAACGTCCGGAGGACATCGTTAACAAC 3' | Forward |
|                                                                          | 5' GTTGTTAACGATGTCTCCGGACGTTGCTGAAAGGTCACGAAAACACCCGGTTCGCCGTG 3'    | Reverse |
| Reading area                                                             | Primer sequence                                                      |         |
| From MBP-Val <sup>260</sup><br>to KaiC <sub>RS</sub> -Gly <sup>160</sup> | 5' GGTGTAACGGTACTGCCGACC 3'                                          |         |
| From Ala <sup>140</sup> to<br>Lys <sup>441</sup>                         | 5' GCGATTGACACCGTTGGT 3'                                             |         |
| From Leu <sup>399</sup> to<br>Ser <sup>568</sup>                         | 5' AAGCATGCTGCTGCGTATTG 3'                                           |         |

399 \*Using KaiC<sub>IRS</sub> as a template for site-directed mutagenesis

400

401

402

403

404

405

406

407

408

409

410

411



412 **Reference**

413

- 414 1 Ishiura, M. *et al.* Expression of a gene cluster kaiABC as a circadian feedback process in  
 415 cyanobacteria. *Science* **281**, 1519-1523, doi:10.1126/science.281.5382.1519 (1998).
- 416 2 Cohen, S. E. & Golden, S. S. Circadian Rhythms in Cyanobacteria. *Microbiol Mol Biol*  
 417 *Rev* **79**, 373-385, doi:10.1128/MMBR.00036-15 (2015).
- 418 3 Golden, S. S. Principles of rhythmicity emerging from cyanobacteria. *Eur J Neurosci* **51**,  
 419 13-18, doi:10.1111/ejn.14434 (2020).
- 420 4 Partch, C. L. Orchestration of Circadian Timing by Macromolecular Protein Assemblies. *J*  
 421 *Mol Biol* **432**, 3426-3448, doi:10.1016/j.jmb.2019.12.046 (2020).
- 422 5 Rust, M. J., Markson, J. S., Lane, W. S., Fisher, D. S. & O'Shea, E. K. Ordered  
 423 phosphorylation governs oscillation of a three-protein circadian clock. *Science* **318**, 809-  
 424 812, doi:10.1126/science.1148596 (2007).
- 425 6 Dvornyk, V., Vinogradova, O. & Nevo, E. Origin and evolution of circadian clock genes  
 426 in prokaryotes. *Proc Natl Acad Sci U S A* **100**, 2495-2500, doi:10.1073/pnas.0130099100  
 427 (2003).
- 428 7 Dvornyk, V. & Knudsen, B. Functional divergence of the circadian clock proteins in  
 429 prokaryotes. *Genetica* **124**, 247-254, doi:10.1007/s10709-005-3146-0 (2005).
- 430 8 Holtzendorff, J. *et al.* Genome streamlining results in loss of robustness of the circadian  
 431 clock in the marine cyanobacterium *Prochlorococcus marinus* PCC 9511. *J Biol Rhythms*  
 432 **23**, 187-199, doi:10.1177/0748730408316040 (2008).
- 433 9 Axmann, I. M. *et al.* Biochemical evidence for a timing mechanism in *prochlorococcus*. *J*  
 434 *Bacteriol* **191**, 5342-5347, doi:10.1128/JB.00419-09 (2009).
- 435 10 Ma, P., Mori, T., Zhao, C., Thiel, T. & Johnson, C. H. Evolution of KaiC-Dependent  
 436 Timekeepers: A Proto-circadian Timing Mechanism Confers Adaptive Fitness in the  
 437 Purple Bacterium *Rhodospseudomonas palustris*. *PLoS Genet* **12**, e1005922,  
 438 doi:10.1371/journal.pgen.1005922 (2016).
- 439 11 Min, H., Guo, H. & Xiong, J. Rhythmic gene expression in a purple photosynthetic  
 440 bacterium, *Rhodobacter sphaeroides*. *FEBS Lett* **579**, 808-812,  
 441 doi:10.1016/j.febslet.2005.01.003 (2005).
- 442 12 Carter, A. P. *et al.* Structure and functional role of dynein's microtubule-binding domain.  
 443 *Science* **322**, 1691-1695, doi:10.1126/science.1164424 (2008).
- 444 13 Schmelling, N. M. *et al.* Minimal tool set for a prokaryotic circadian clock. *BMC Evol Biol*  
 445 **17**, 169, doi:10.1186/s12862-017-0999-7 (2017).
- 446 14 Aoki S, O. K. in *Bacterial circadian programs* (ed Mackey SR Ditty JL, Johnson CH)  
 447 Ch. 15, 259 –282 (Springer, 2009).
- 448 15 Wiegard, A. *et al.* Biochemical analysis of three putative KaiC clock proteins from  
 449 *Synechocystis* sp PCC 6803 suggests their functional divergence. *Microbiol-Sgm* **159**, 948-  
 450 958, doi:10.1099/mic.0.065425-0 (2013).
- 451 16 Pattanayek, R. *et al.* Analysis of KaiA-KaiC protein interactions in the cyano-bacterial  
 452 circadian clock using hybrid structural methods. *EMBO J* **25**, 2017-2028,  
 453 doi:10.1038/sj.emboj.7601086 (2006).
- 454 17 Nishiwaki-Ohkawa, T., Kitayama, Y., Ochiai, E. & Kondo, T. Exchange of ADP with ATP  
 455 in the CII ATPase domain promotes autophosphorylation of cyanobacterial clock protein  
 456 KaiC. *Proc Natl Acad Sci U S A* **111**, 4455-4460, doi:10.1073/pnas.1319353111 (2014).

457 18 Kim, Y. I., Dong, G., Carruthers, C. W., Jr., Golden, S. S. & LiWang, A. The day/night  
458 switch in KaiC, a central oscillator component of the circadian clock of cyanobacteria.  
459 *Proc Natl Acad Sci U S A* **105**, 12825-12830, doi:10.1073/pnas.0800526105 (2008).

460 19 Swan, J. A. *et al.* Hidden conformations differentiate day and night in a circadian  
461 pacemaker. *bioRxiv*, 2021.2009.2014.460370, doi:10.1101/2021.09.14.460370 (2021).

462 20 Egli, M. *et al.* Loop-loop interactions regulate KaiA-stimulated KaiC phosphorylation in  
463 the cyanobacterial KaiABC circadian clock. *Biochemistry* **52**, 1208-1220,  
464 doi:10.1021/bi301691a (2013).

465 21 Hayashi, F. *et al.* ATP-induced hexameric ring structure of the cyanobacterial circadian  
466 clock protein KaiC. *Genes Cells* **8**, 287-296 (2003).

467 22 Nishiwaki, T. *et al.* Role of KaiC phosphorylation in the circadian clock system of  
468 *Synechococcus elongatus* PCC 7942. *Proc Natl Acad Sci U S A* **101**, 13927-13932,  
469 doi:10.1073/pnas.0403906101 (2004).

470 23 Xu, Y. *et al.* Identification of key phosphorylation sites in the circadian clock protein KaiC  
471 by crystallographic and mutagenetic analyses. *Proc Natl Acad Sci U S A* **101**, 13933-13938,  
472 doi:10.1073/pnas.0404768101 (2004).

473 24 Kitayama, Y., Iwasaki, H., Nishiwaki, T. & Kondo, T. KaiB functions as an attenuator of  
474 KaiC phosphorylation in the cyanobacterial circadian clock system. *EMBO J* **22**, 2127-  
475 2134, doi:10.1093/emboj/cdg212 (2003).

476 25 Chang, Y. G. *et al.* Circadian rhythms. A protein fold switch joins the circadian oscillator  
477 to clock output in cyanobacteria. *Science* **349**, 324-328, doi:10.1126/science.1260031  
478 (2015).

479 26 Tseng, R. *et al.* Structural basis of the day-night transition in a bacterial circadian clock.  
480 *Science* **355**, 1174-1180, doi:10.1126/science.aag2516 (2017).

481 27 Abee, T., Hellingwerf, K. J. & Konings, W. N. Effects of potassium ions on proton motive  
482 force in *Rhodobacter sphaeroides*. *J Bacteriol* **170**, 5647-5653,  
483 doi:10.1128/jb.170.12.5647-5653.1988 (1988).

484 28 Terauchi, K. *et al.* ATPase activity of KaiC determines the basic timing for circadian clock  
485 of cyanobacteria. *Proc Natl Acad Sci U S A* **104**, 16377-16381,  
486 doi:10.1073/pnas.0706292104 (2007).

487 29 Nishiwaki, T. & Kondo, T. Circadian autodephosphorylation of cyanobacterial clock  
488 protein KaiC occurs via formation of ATP as intermediate. *J Biol Chem* **287**, 18030-18035,  
489 doi:10.1074/jbc.M112.350660 (2012).

490 30 Phong, C., Markson, J. S., Wilhoite, C. M. & Rust, M. J. Robust and tunable circadian  
491 rhythms from differentially sensitive catalytic domains. *Proc Natl Acad Sci U S A* **110**,  
492 1124-1129, doi:10.1073/pnas.1212113110 (2013).

493 31 Murakami, R. *et al.* Cooperative Binding of KaiB to the KaiC Hexamer Ensures Accurate  
494 Circadian Clock Oscillation in Cyanobacteria. *Int J Mol Sci* **20**, doi:10.3390/ijms20184550  
495 (2019).

496 32 Snijder, J. *et al.* Insight into cyanobacterial circadian timing from structural details of the  
497 KaiB-KaiC interaction. *Proc Natl Acad Sci U S A* **111**, 1379-1384,  
498 doi:10.1073/pnas.1314326111 (2014).

499 33 Rust, M. J., Golden, S. S. & O'Shea, E. K. Light-driven changes in energy metabolism  
500 directly entrain the cyanobacterial circadian oscillator. *Science* **331**, 220-223,  
501 doi:10.1126/science.1197243 (2011).

502 34 Truebestein, L. & Leonard, T. A. Coiled-coils: The long and short of it. *Bioessays* **38**, 903-  
503 916, doi:10.1002/bies.201600062 (2016).

504 35 Liu, J. & Rost, B. Comparing function and structure between entire proteomes. *Protein Sci*  
505 **10**, 1970-1979, doi:10.1110/ps.10101 (2001).

506 36 Pattanayek, R. *et al.* Visualizing a circadian clock protein: crystal structure of KaiC and  
507 functional insights. *Mol Cell* **15**, 375-388, doi:10.1016/j.molcel.2004.07.013 (2004).

508 37 Krissinel, E. & Henrick, K. Inference of macromolecular assemblies from crystalline state.  
509 *J Mol Biol* **372**, 774-797, doi:10.1016/j.jmb.2007.05.022 (2007).

510 38 Anisimova, M., Gil, M., Dufayard, J. F., Dessimoz, C. & Gascuel, O. Survey of branch  
511 support methods demonstrates accuracy, power, and robustness of fast likelihood-based  
512 approximation schemes. *Syst Biol* **60**, 685-699, doi:10.1093/sysbio/syr041 (2011).

513 39 Chovancova, E. *et al.* CAVER 3.0: a tool for the analysis of transport pathways in dynamic  
514 protein structures. *PLoS Comput Biol* **8**, e1002708, doi:10.1371/journal.pcbi.1002708  
515 (2012).

516 40 Kagawa, R., Montgomery, M. G., Braig, K., Leslie, A. G. & Walker, J. E. The structure of  
517 bovine F1-ATPase inhibited by ADP and beryllium fluoride. *EMBO J* **23**, 2734-2744,  
518 doi:10.1038/sj.emboj.7600293 (2004).

519

520
